# FACTORS AFFECTING RESPONSE TO RECURRENT GENOMIC SELECTION IN SOYBEANS

**Vishnu Ramasubramanian\*<sup>†</sup> and William D Beavis\*<sup>†</sup>**

\* Department of Agronomy

<sup>†</sup> Bioinformatics and Computational Biology Graduate Program

Iowa State University, Ames, Iowa, USA - 50010

## **1) Vishnu Ramasubramanian**

1525, Agronomy Hall, ISU

Ames, IA 50011

Phone: 515 598 6376

Email: [vishnur@iastate.edu](mailto:vishnur@iastate.edu)

## **2) William Beavis\***

1208, Agronomy Hall, ISU

Ames, IA 50011

Phone: 800 450 4854 (4412)

Fax: 515 294 730

E-mail: [wbeavis@iastate.edu](mailto:wbeavis@iastate.edu)

## **Factors affecting Response to Recurrent Genomic Selection in Soybeans**

**Keywords: Genomic Selection, Genetic Response, Recurrent Selection, Soybean, Nested**

**Association Mapping**

**Corresponding Author:**

Vishnu Ramasubramanian

1525, Agronomy Hall, ISU

Ames, IA 50011

Phone: 515 598 6376

Email: [vishnur@iastate.edu](mailto:vishnur@iastate.edu)

## 1 **Abstract**

2 Herein we report the impacts of applying five selection methods across 40 cycles of recurrent  
3 selection and identify interactions with other factors on genetic response using simulated families  
4 of recombinant inbred lines derived from 21 homozygous soybean lines used for the Soybean  
5 Nested Association Mapping study. The other factors we investigated included the number of  
6 quantitative trait loci, broad sense heritability on an entry mean basis, selection intensity, and  
7 training sets. Both the rates of genetic improvement in the early cycles and limits to genetic  
8 improvement in the later cycles are affected by interactions among the factors. All genomic  
9 selection methods provided greater rates of genetic improvement (per cycle) than phenotypic  
10 selection, but phenotypic selection provided the greatest long term responses. Model updating  
11 significantly improved prediction accuracy and genetic response for three parametric genomic  
12 prediction models. Ridge Regression, if updated with training sets consisting of data from prior  
13 cycles, achieved greater rates of response relative to BayesB and Bayes LASSO GP models. A  
14 Support Vector Machine method, with a radial basis kernel, resulted in lowest prediction  
15 accuracies and the least long term genetic response. Application of genomic selection in a closed  
16 breeding population of a self-pollinated crop such as soybean will need to consider the impact of  
17 these factors on trade-offs between short term gains and conserving useful genetic diversity in  
18 the context of goals for the breeding program.

19

## 20 **Background**

21 Plant breeding programs consist of 1) recurrent genetic improvement projects, 2) variety  
22 development projects 3) trait introgression projects and 4) product placement projects (Fehr,  
23 1991). Genetic improvement is assessed using realized genetic gain, which is an estimate of  
24 change of the average genotypic value for traits of interest across cycles of selection and inter-  
25 mating. Perhaps the most relevant trait for assessment of genetic gain is yield per unit land. Yield  
26 gains in many crop species in both developing and some developed countries have stagnated  
27 (Bhatia et al. 2008; Van Ittersum et al. 2013; Liu et al. 2016)

28 Since 2007, plant breeding programs have investigated genomic prediction (GP) models for  
29 application to genetic improvement (Bernardo & Yu 2007; Heffner et al. 2009). Three aspects of  
30 GP have been investigated: i) estimation of accuracies from prediction models (Habier et al.  
31 2007; Goddard 2009; Zhong et al. 2009; Jannink 2010; Heffner et al. 2011; Bastiaansen et al.  
32 2012; Bijma 2012; Wimmer et al. 2013; Lorenz 2013; Hickey et al. 2014, 2017), ii) selection of  
33 experimental lines to include in a crossing nursery (Cochran 1951; Bertan et al. 2007; Bos and  
34 Caligari 2008; Bernardo 2014) and iii) decisions about which lines to cross to create a new cycle  
35 of evaluation and selection (Akdemir & Sánchez 2016; Xu et al. 2017; Goiffon et al. 2017;  
36 Gorjanc et al. 2018).

37 Genetic improvement and cultivar development in crops that are primarily propagated through  
38 self-pollination (e.g., barley, canola, maize, oat, rice, soybean, sorghum, wheat, etc.) involves  
39 the derivation of homozygous lines, i.e., replicable genotypes, for phenotypic evaluation across  
40 many environments and selection. Creation of replicable lines prior to evaluation and crossing  
41 assures that every line selected for initiating a cycle of genetic improvement will produce  
42 identical gametes in which all alleles are completely linked. Benefits from creating replicable

43 lines include: 1) ability to estimate repeatability of line performance across geography and time,  
44 2) ability to estimate genotype by environment interactions (GxE) that can be used to distribute  
45 lines adapted to specific types of environments and 3) additive genetic variance among  
46 homozygous lines will be about twice as large as it would be if replicable lines were not created.  
47 As a consequence, genomic selection was not immediately adopted for line development after it  
48 was introduced in 2001 (Meuwissen et al. 2001). Animal breeders made most of the initial  
49 developments and improvements in application of genomic selection (Meuwissen 1997; Li et al  
50 2008; Dekkers 2010; Dekkers 2012; de los Campos et al. 2013; Henryon et al. 2014). None-the-  
51 less, several crop breeders have successfully applied GS and demonstrated its short term  
52 advantage for genetic gain relative to phenotypic selection in barley, oats, wheat, soybean and  
53 maize (Bernardo 2008, 2014; Jannink et al. 2010; Asoro et al. 2011; Heslot et al. 2012; Nakaya  
54 and Isobe 2012; Hagan et al. 2012 ; Emily and Bernardo 2013; Crossa et al. 2014; Heslot et al.  
55 2015; Liu et al. 2015; Beyene et al. 2015; Bassi et al. 2016; Marulanda et al. 2016; Jonas and de  
56 Koning 2013, 2016; Hickey et al. 2017; Goiffon et al. 2017).

57 Robertson (Robertson 1960) demonstrated that the rate of genetic gain for selection of traits with  
58 additive genetic architectures is greatest in the first few cycles, while later cycles asymptotically  
59 approach a limit. Hill and Robertson (1966) demonstrated that linkage can affect both the initial  
60 rate of genetic gain and selection limits. Felsenstein (1974) termed this the Hill-Robertson (HR)  
61 effect, where the magnitude of HR effect is determined by selection intensity and initial additive  
62 gene frequencies. The HR effect plays a role only in moderate/weak selection, where effective  
63 population size ( $N_e$ ) plays a role in determining the probability of fixation through drift  
64 (Comeron et al. 2008). In the absence of epistasis and strong selection pressure, linkage  
65 dominates and the effect of linkage disequilibrium (LD) on rate of gain under selection can be

66 ignored (Felsenstein 1965, 1974; Kimura 1965; Nagylaki 1974). However, the HR effect can  
67 increase negative linkage disequilibrium as the linkage distance between two loci decreases  
68 (Comeron et al. 2008). In addition, greater selection intensities reduce the genetic potential of  
69 founder populations. The drop in genetic potential during the selection process can be prevented  
70 by reintroduction of discarded favorable alleles (Robertson 1960; Hill and Robertson 1966;  
71 Maynard and Haigh 1974; Comeron et al. 2008).

72 Previous studies point to differences among models for prediction accuracy and genetic  
73 response, but indicate that specific outcomes depend on conditions of genome organization,  
74 population structure, genetic architecture and selection intensity (Lorenz 2013; Rutkoski et al.  
75 2015; Goiffon et al. 2017; Matei et al. 2018; Norman et al. 2018). In addition, training  
76 population size affects prediction accuracy and genetic gain. Larger training population sizes  
77 result in more accurate predictions and greater short term genetic improvement (Akdemir et al.  
78 2015; Jarquin et al. 2016; Xavier et al. 2017). However, estimates of accuracy approach a limit  
79 depending on genome organization and population structure. Prediction accuracy is improved if  
80 the training set is selected to represent a larger proportion of a heterogeneous population for a  
81 targeted population of environments (Xavier et al. 2016; Jarquin et al. 2018).

82 Marker density also impacts accuracy and short term genetic gains, with a dense marker set  
83 performing better than a sparse set. But the improvement in accuracy and gain reaches a limit  
84 within a range of marker density depending on LD associated with the population structure.  
85 Empirical and simulation studies on maize, soybean and other crops have identified such a  
86 threshold value of marker density above which increasing marker density doesn't result in  
87 significant improvements in accuracy and genetic gain (de Roos et al. 2009; Schulz-Streeck et  
88 al. 2012; Hickey et al. 2014; Xavier et al, 2016; Norman et al. 2018)

89 Accuracy and gain are greater for traits with high heritability as a larger fraction of genotypic  
90 variance is represented in the phenotypic variance. Genetic architecture also impacts accuracy  
91 and gain (Wimmer et al. 2013). One of the important factors that contribute to higher rates of  
92 short term genetic improvement is shorter time per cycle of GS relative to PS. Phenotyping  
93 requires an evaluation phase conducted across multiple years, which is skipped with GS, which  
94 can reduce the interval between evaluation and crossing to create a new cohort of progeny by  
95 two or three years for most crops, depending on the number of generations that can be grown in  
96 continuous nurseries (Heffner et al. 2009).

97 The type of GP model used affects both prediction accuracy and the magnitudes of residual  
98 deviations from predicted values (Long et al. 2011; Heslot et al. 2012; Howard et al. 2014).

99 Comparison of various models for GP have established the important role of genetic architecture  
100 (de los Campos et al. 2010, 2013; Howard et al. 2014). Howard et al (2014) compared the  
101 performance of a set of 14 GP models on F2 and Backcross simulated populations with additive  
102 and epistatic genetic architectures. Parametric methods such as Ridge Regression-BLUP and  
103 Bayesian regression methods in the mixed effects modeling framework perform well for traits  
104 with additive genetic architecture, whereas non-parametric machine-learning methods such as  
105 Neural Networks and Support Vector Machines provide more accurate predictions for traits with  
106 epistatic genetic architectures (Howard et al. 2014, 2016, and 2017). Prediction accuracies are  
107 essentially the same for all GP models applied to data with additive genetic architectures (Long  
108 et al. 2010, 2011; Guo et al. 2012; Howard et al. 2014). This was also the case in a hybrid maize  
109 line development program for a set of six traits in recombinant inbred lines derived from bi-  
110 parental families (Bernardo and Yu 2007). However, a Reproducing Kernel Hilbert Space  
111 (RKHS) model (De Los Campos et al. 2009, 2010), a semi-parametric method, showed a higher

112 accuracy in F2:3 populations that are comprised of a larger proportion of heterozygotes (Liu et  
113 al. 2018). A bagging method that combined RKHS and Bayes-B (BB) demonstrated the best  
114 prediction accuracy in SoyNAM population for yield, height and maturity (Xavier et al. 2016). In  
115 another study of experimental data, Bayesian methods had similar or better prediction accuracies  
116 than SVM and Multi-Layer Perceptron (MLP) (Montesinos-López et al. 2019).

117 Given the difficulty of conducting long-term genomic selection in experimental systems,  
118 simulations have been used to examine trends across multiple cycles of recurrent genomic  
119 selection (Habier et al. 2007; Goddard 2009; Jannink 2010; Bastiaansen et al. 2012; Bijma 2012;  
120 de los Campos et al. 2013; Liu et al. 2015; Michel et al. 2016). These studies have shown that  
121 selection response, represented as standardized genotypic values, is expected to be faster with  
122 GS in early cycles and then decrease in later cycles relative to standardized genetic response with  
123 phenotypic selection (PS) (Jannink 2010).

124 Parametric and non-parametric GP models have different impacts on simulated genetic gains  
125 (Bernardo and Yu 2007; Habier et al. 2007). While, Ridge Regression (RR) (Endelman 2011)  
126 and Bayesian methods (Pérez and de los Campos 2014) were associated with similar short-term  
127 genetic gains, but different long-term gains. In the initial cycles of recurrent selection genetic  
128 gains and estimates of accuracy were similar between Bayes LASSO (BL) and RR methods,  
129 whereas long-term limits to genetic response were better with BL and genetic variance was  
130 maintained through later cycles (Liu et al. 2015). In the initial cycles of recurrent selection  
131 genetic gains and estimates of accuracy were similar between BL and RR, whereas long-term  
132 limits to genetic response were better with BL. It was also noted that genetic variance was  
133 maintained through later cycles when selection was based on predicted values from BL (Liu et  
134 al. 2015).



135 Decreased prediction accuracy of GP models in recurrent GS is often due to decay of LD  
136 between marker loci and QTL, loss of relationships between lines in early and later cycles of  
137 selection or a combination of both (Habier et al. 2007; Zhong et al. 2009; Hickey et al. 2014; Liu  
138 et al. 2015; Müller and Melchinger 2017, 2018). Shrinkage based methods used for estimation of  
139 marker effects have an impact on relatedness of lines that are selected. The impact of  
140 relationships on prediction accuracies is greater for RR than BL because RR is more dependent  
141 on relationships within a population, whereas accuracy of bayesian models such as BL is more  
142 dependent on LD between marker loci (ML) and QTL, whereas accuracy of BayesB is dependent  
143 on both components (Habier et al. 2007; Zhong et al. 2009; Liu et al. 2015). Closely related  
144 lines tend to be selected as parents with RR, whereas BL maintains a lower rate of inbreeding.  
145 Maintaining a lower rate of inbreeding results in greater long-term genetic gains. (Meuwissen  
146 1997; Li et al. 2008; Akdemir and Sánchez 2016).

147 Prediction accuracies can be maintained across cycles of selection by updating GP models with  
148 new genotypic and phenotypic information from each cycle of selection (Jannink 2010; Liu et al.  
149 2015; Müller et al. 2017, 2018). One approach is to use training data from only the current cycle  
150 of selection. With this approach, predictions do not take into account relationships between the  
151 current population and the founder population or populations from previous cycles of selection.  
152 At the other extreme, data from all prior cycles of selection can be included with data from the  
153 current cycle in the training set. However, there are practical computation limits to the number of  
154 prior cycles of selection that can be included for training GP models. In particular we found that  
155 Bayesian and SVM GP model training time (run time in hours/cycle) increases exponentially  
156 with the size of training populations and requires intensive computing resources that are difficult  
157 to obtain (Figure S1).

158 Recurrent cycles of selection could generate populations with little genetic covariance with the  
159 founder population, so inclusion of data from early cycles in the training set of later cycles may  
160 have limited value. The actual structure of genetic covariance that emerges over cycles of  
161 recurrent selection will affect number of cycles of data that need to be included in the training set  
162 to obtain accurate predictions. However, as noted, the actual impact of including data from prior  
163 cycles on accuracies of GP models depends on whether the models rely on relationships among  
164 lines or on LD between ML and QTL. Moreover, the practice of model updating involves  
165 phenotyping, which can adversely affect the relative advantage of GS over PS in terms of gain  
166 per unit of time as phenotyping takes additional growing season(s) for each cycle (Heffner et al.  
167 2009; Rutkoski et al. 2015; Matei et al. 2018). In practice, animal breeders use training data from  
168 up to three prior cycles of selection including training data from current cycle (personal  
169 communication, Jack Dekkers). Practical guidelines for training sets have not been established  
170 for recurrent selection of crop species, in particular soybeans.

171 Recognizing the relatively slow genetic improvement of yield and other polygenic traits of  
172 soybeans in the corn-soybean agricultural systems of the primary soybean production region in  
173 the United States, the North Central Soybean Research Program (NCSRP) supported public  
174 soybean breeders to utilize information from the SoyNAM genome wide association study to  
175 evaluate implementation of GS in soybean breeding populations  
176 ([https://www.ncsrp.com/NCSRP\\_research.html#yield](https://www.ncsrp.com/NCSRP_research.html#yield)). As a precursor to experimental  
177 investigations of recurrent GS in Soybean we utilized simulations (Cooper et al. 2002) based on  
178 the genomic organization and population structure of the SoyNAM founders to evaluate genetic  
179 responses to five selection methods, three selection intensities, three genetic architectures  
180 responsible for 0.3 or 0.7 of the total phenotypic variance ( $H$  - broad sense heritability on an

181 entry mean basis) and four types of training sets across 40 cycles of recurrent selection. While  
182 the outcomes are specific to soybean genomes adapted to the primary soybean production region,  
183 there are implications for genetic improvement of all line development programs of diploids that  
184 utilize derivation of homozygous lines for evaluation and selection.

## 185 **Methods**

186 *Simulations and Treatment Design.* The impact of number of QTL, selection intensity,  
187 heritability, training set and selection methods on response to selection across 40 cycles of  
188 recurrent selection were evaluated using 306 combinations of factors. Explicitly the treatments  
189 consisted of three numbers of simulated QTL and three selection intensities, two values for non-  
190 genetic variance, five selection methods and four types of training sets used to update four  
191 genomic prediction models. In summary the treatment design consists of 18 combinations of  
192 factors for phenotypic selection (PS) plus 288 combinations of factors for genomic selection  
193 (GS) methods for a total of 306 combinations of factors. Each set of factor combinations was  
194 replicated with ten simulated recurrent selections across 40 cycles resulting in 3060 simulations  
195 with 122400 outcomes. Note that different training sets are irrelevant for PS and thus the  
196 treatment design is not a complete factorial.

197 Simulated soybean RILs were generated by crossing *in silico* 20 homozygous SoyNAM founder  
198 lines with IA3023 to generate 20 distinct F<sub>1</sub> progeny. The F<sub>1</sub> progeny from each of the 20 crosses  
199 were self-pollinated *in silico* for five generations to generate 100 RILs per family. The resulting  
200 2000 RILS from 20 families had segregating genotypic information at 4289 genetic loci. Based  
201 on NAM genotypic data, we simulated alleles from common founder line with a frequency of 0.9  
202 and alleles from other founder lines with a frequency of 0.1.

203 Subsets of 40, 400, and 4289 SNP marker loci were designated as QTL. The QTL were  
204 distributed evenly throughout the genome, and each contributed equal additive effects of 5/-5,  
205 0.5/-0.5, or 0.05/-0.05 units respectively to the total genotypic value the simulated RILs. Thus,  
206 all three genetic architectures had the same potential to create genotypic values ranging from  
207 +200 to -200 genotypic units in the initial founder sets of RILs. Phenotypic values were  
208 simulated by adding non-genetic variance sampled from an  $N(0, \sigma)$  distribution to the simulated  
209 genotypic values, where  $\sigma$  was determined by the heritability on an entry mean basis among the  
210 initial sets of founder sets of RILs. Broad sense heritability on an entry mean basis ( $H$ ) values of  
211 0.7 and 0.3 were simulated for each of the three sets of QTL. After the phenotypic values were  
212 simulated in the initial founding sets of RILs, the non-genetic variance was held constant across  
213 subsequent cycles of selection.

214 For each cycle of recurrent selection, 1%, 2.5% or 10% of the most positive phenotypic or  
215 predicted genotypic values among 2000 simulated RILs were selected as parents to inter-mate  
216 for the next cycle (Figure 1). This corresponds to selection intensities of 2.67, 2.34 and 1.75 in  
217 terms of standardized selection differential,  $i$ .

218 Based on previous results from Howard et al (2014), four GS methods were evaluated. Ridge  
219 Regression (RR) was selected to represent a frequentist parametric model. Bayes-B (BB) and  
220 Bayesian LASSO (BL) were selected to represent parametric bayesian models and Support  
221 Vector Machine with Radial Basis Kernel (SVM-RBF) represented a non-parametric method of  
222 machine learning. Ridge regression was implemented with a method that employs expectation  
223 maximization to obtain Restricted Maximum Likelihood estimates of marker effects (Xavier  
224 2019). This computational method is faster than the popular implementation of ridge regression  
225 in rrBLUP package (Endelman 2011) and produces values that are highly correlated with the

226 predictions based on the rrBLUP package (Figure S2). The BGLR package (Perez and de los  
227 Campos 2014) provided implementations of BB and BL models. The ‘Rgtsvm’ package in R was  
228 used as an implementation of the SVM with RBF kernel method (Wang et al. 2017). ‘Rgtsvm’  
229 implements SVM training on GPUs with computing time several hundred times less than that  
230 required for the implementation in ‘caret’ package on high performance computing clusters, with  
231 similar prediction accuracies and estimates of mean squared errors (Figure S3). The parameters  
232 used to train GP models are provided in Table 3.

233 A preliminary analysis of training sets on genotypic values and prediction accuracies was  
234 conducted using RR models trained with data from the current cycle as well as 3, 5, 6, 8, 10, 12,  
235 and 14 prior cycles. The results were compared with responses from the RR model updated with  
236 cumulative training set comprised of data from all prior cycles and with no updating using prior  
237 cycles. Training sets for each cycle were obtained by randomly sampling 1600 RILs from the set  
238 of 2000 simulated RILs in each cycle. The most accurate predictions and maximum genetic  
239 response was obtained with training data that is cumulatively added every cycle (Figures S4 and  
240 S5). The results indicate that including 3-5 prior cycles of training data did not significantly  
241 improve prediction accuracies and responses relative to models that were not updated. Also, the  
242 standardized genotypic values and prediction accuracies obtained using 10 to 14 prior cycles of  
243 data in the training set were not significantly different than results based on training sets  
244 consisting of all prior cycles. Based on the results of this preliminary study, we investigated  
245 responses to recurrent selection using training sets consisting of up to 14 prior cycles of selection  
246 as well as data from the current cycle. After the 14<sup>th</sup> cycle, training data consisted of only the 14  
247 prior cycles of recurrent selection and before the 14<sup>th</sup> cycle, training data from all prior cycles

248 were included. For purposes of this manuscript we use the phrase ‘model updating’ to refer to  
249 retraining GP models with up to 14 previous cycles of training data (Figure 2).

250 *Evaluation Metrics.* The standardized genotypic value,  $R_s$  (1), was estimated every cycle as the  
251 change in genotypic value from the average genotypic value of 2000 RILs derived from the  
252 initial founders and standardized to the maximum genotypic potential (200 units) among the  
253 founders (Meuwissen et al. 2001; Liu et al. 2015).

254 
$$R_s = \frac{R_c}{(R_m - R_0)} \quad (1)$$

255  $R_s$  - Standardized genotypic value  
256  $R_0$  - Average genotypic value of RILs produced by founders  
 $R_c$  - Average genotypic value in cycle  $c - R_0$   
 $R_m$  - Maximal possible genotypic value (=200)

257 The maximum genotypic value ( $M_{gv}$ ) among the RIL’s selected in cycle  $c$  is a metric used to  
258 evaluate the best RIL produced each cycle, while the standardized genotypic variance ( $SV_g$ )  
259 defined as the estimated genotypic variance divided by the estimated genotypic variance of the  
260 initial population, was used to evaluate the loss of genotypic variability. Note that values for the  
261  $SV_g$  range from zero to one. Estimated Linkage disequilibrium ( $LD$ ) among pairs of marker loci  
262 on all 20 chromosomes was evaluated as the deviation of observed gametic frequency of alleles  
263 at a pair of loci from the product of the individual allele frequencies, assuming independence  
264 (Weir 1996). GP models were assessed using the estimated prediction accuracies ( $r_{ps}$ ), defined as  
265 the estimated linear correlation (Pearson) between predicted and simulated genotypic values and  
266 with estimated Mean Squared Error (MSE), defined as the sum of the squared deviations of the  
267 predicted genotypic values from the simulated values.

268 *Modeled response to recurrent selection.* The averaged Rs for each cycle, c, of recurrent  
269 selection were modeled with a linear first order recurrence equation:

270 
$$f_0(c)y_{(c+1)} + f_1(c)y_{(c)} = g(c)$$

271 Where c is a sequence of integers from 0 to 39 representing each cycle of recurrent selection and  
272  $f_0, f_1$  and  $g$  are constant functions of c. By rearranging the equation we note that the response in  
273 cycle c+1 can be represented as

274 
$$y_{(c+1)} = -\frac{f_1(c)}{f_0(c)}y_{(c)} + \frac{g(c)}{f_0(c)}$$

275 Since the ratios  $f_1(c)/f_0(c)$  and  $g(c)/f_0(c)$  are constants, we can represent the response in cycle c+1  
276 as

277 
$$y_{(c+1)} = \alpha y_{(c)} + \beta \quad (2)$$

278 If  $y_0$  specifies the average phenotypic value of the first generation of RILs derived from the  
279 founders, then (2) has a unique solution (Goldberg 1958):

280 
$$y_c = \alpha^c y_0 + \beta \frac{1 - \alpha^c}{1 - \alpha} \quad \text{if } \alpha \neq 1 \quad (3)$$
  
$$y_c = \alpha^c y_0 + \beta c \quad \text{if } \alpha = 1$$

281 An alternative representation of (3) for the situation of  $\alpha \neq 1$  is

282 
$$y_c = \alpha^c (y_0 - y') + y'$$
  
$$\text{with } y' = \frac{\beta}{1 - \alpha},$$

283 , where  $\alpha$  is less than 1 for genotypic response to recurrent selection and  $y'$  represents the  
284 asymptotic limit to selection (Goldberg 1958). To illustrate, values of the sequence of c=0 to 39,

285 with  $y_0 = 0$ ,  $\alpha = 0.9$  and  $\beta = 15$ , are plotted in Figure 3. The curve can be interpreted as response  
286 to selection as a function of the frequencies of alleles with additive selective advantage, selection  
287 intensity, time and effective population size (Robertson 1960).

288 The parameters,  $y_0$ ,  $\alpha$  and  $\beta$ , were estimated with a non-linear least squares method implemented  
289 in the ‘nls’ function of the R base package and the ‘nlsList’ and ‘nlme’ functions in the nlshelper  
290 and ‘nlme’ packages (Pinheiro and Bates 2000; Baty et al. 2015; Pinheiro et al. 2019).

291 *Analyses of variance (ANOVA) across 40 cycles of recurrent selection.* The purpose of the  
292 ANOVA is to evaluate significant differences in the modeled response pattern of PS and four GP  
293 models, based on three genetic architectures, with two levels of non-genetic contributions to the  
294 phenotypes, three selection intensities and four training sets for the GP models. The influence of  
295 multiple factor treatment combinations on estimated non-linear regression models have not been  
296 implemented in standard statistical software packages that report the analysis of variance in  
297 terms of sums of squares and traditional ‘F-tests’. For discussions on the challenges of using  
298 standard F-test for non-linear mixed effects models see (Pinheiro et al. 2000; Baty et al. 2015;  
299 Pinheiro et al. 2019). Consequently, we analyzed the variance among modeled responses using  
300 AIC, BIC and Likelihood metrics that were grouped based on combinations of treatment  
301 variables consisting of selection methods, training sets, selection intensities, number of simulated  
302 QTL and H (Table 1).

303 We conducted analyses of variance using non-linear least squares on modeled (3) responses  
304 grouped by treatment factors (Table 3). In order to provide a balanced data table for analyses by  
305 nlme responses from PS were assumed constant for training set levels resulting in responses for  
306 360 combinations of treatment factors. The impact of these factors and their interactions on the  
307 modeled response was analyzed using the groupedData function in R to generate data partitions



308 conditioned on groups of factors. Estimates of modeled parameters were retained as fixed effects  
309 and deviations from estimated means conditioned on grouping variables were modeled as  
310 random effects using ‘nlme’ R package. Multiple analyses of ‘nlme’ objects representing the  
311 models were used to identify combinations of factors with significant effects on the non-linear  
312 response model. More information on the analyses can be found in the R package  
313 ‘SoyNAMPredictionMethods’  
314 ([http://gfspopgen.agron.iastate.edu/SoyNAM\\_PredictionMethods.html](http://gfspopgen.agron.iastate.edu/SoyNAM_PredictionMethods.html)).

### 315 **Analyses and Data Availability**

316 Simulated data and codes are available as part of R package ‘SoyNAMPredictionMethods’ (File  
317 S1). All supplemental material including the R package has been uploaded to Figshare and can  
318 be found at <https://figshare.com/s/8dba182a46fe1a28c1af>. Documentation to use package is  
319 available at [http://gfspopgen.agron.iastate.edu/SoyNAM\\_PredictionMethods.html](http://gfspopgen.agron.iastate.edu/SoyNAM_PredictionMethods.html). SoyNAM  
320 genotypic and phenotypic data is available in SoyBase database (Grant et al. 2010).

321

### 322 **Results**

323 *Modeled genotypic values across 40 cycles of recurrent selection.* Average genotypic values  
324 grouped on each of five factors provide an overview of differences in rate of response and limits  
325 to response among levels within a factor (Figure S6 - S10). The response of averaged Rs (Figure  
326 3) were modeled with recurrence equation (3) and the results are consistent with predicted values  
327 and theory by Robertson (1960). There is strong evidence from the analyses of variance (Table  
328 3) that the response of modeled genotypic values across cycles of selection depend on  
329 interactions among all simulated factors. The most parsimonious model requires unique

330 estimates of  $\alpha$ , and  $\beta$  in equation (3) for each of the 306 combinations of factors (File S2).

331 Estimates of  $\alpha$ , and  $\beta$  for all factor combinations are provided in File S2.

332 *Prediction accuracies in the founding sets of RILs:* Estimates of prediction accuracies,  $r_{ps}$ , of GP  
333 models trained with the initial set of 2000  $F_5$ -derived RILs from 20 crosses ranged from 0.75-  
334 0.82 for H of 0.7 and ranged from 0.38 - 0.49 for H of 0.3 (Figure 4). The initial  $r_{ps}$  for both H  
335 values was best with BB and poorest with the SVM-RBF. The nQTL had little effect on  $r_{ps}$   
336 within either value of 0.7 or 0.3 for H. RR and BL had smaller magnitude MSE values than BB  
337 and SVM RBF for all numbers of simulated QTL and both values for H (Figure 4).

338 *Comparisons of Selection Methods.* Both the rates and limits of response from selection in terms  
339 of  $R_s$  are influenced by the five selection methods and their interactions with training sets,  
340 selection intensities, nQTL, and H (Figure 5 and S11). Small nQTL, high values for H and high  
341 selection intensities resulted in the greatest initial rates (per cycle) of response while large nQTL,  
342 low values of H and relaxed selection intensity showed less rapid initial responses but realized  
343 greater  $R_s$  values for all PS and GS methods with and without updated training sets. Relative to  
344 PS, most GS methods provided greater initial rates of response per cycle, but limits to selection  
345 responses depended on the other factors (Figure 5). In this section, we describe results from top  
346 10% selected fraction for all the GS methods as the differences among GS methods are more  
347 pronounced with relaxed selection intensity. Results from top 1% and 2.5% selected fraction are  
348 described in later sections.

349 When GP models are not updated, BB demonstrated the largest  $R_s$  in the early cycles for 40  
350 QTL responsible for 70% of phenotypic variability in the initial population, whereas for 400 and  
351 4289 QTL PS demonstrated greater responses than all GS methods after the 10<sup>th</sup> cycle (Figure 5  
352 and 6). For H value of 0.3 in the initial populations, BB also had the largest  $R_s$  values for 40, 400

353 and 4289 QTL in the early cycles. Whereas after 10<sup>th</sup> cycle, PS demonstrated the largest Rs  
354 values for 40, 400 and 4289 simulated QTL (Figure S11 and S12; File S3). In contrast, when the  
355 GP models are updated with training sets consisting of data from up to 14 prior cycles of  
356 recurrent selection, GS using RR models demonstrated largest the Rs values for 40, 400 and  
357 4289 QTL for both heritabilities (Figure 7 and S13; File S3).

358 If the BB models are not updated with data from prior cycles, then the Rs from 40 simulated  
359 QTL and 0.7 H in the initial population were 10 to 16% greater than they were with PS in the  
360 first five cycles. For the same genetic architecture, recurrent selection with BL and RR models  
361 resulted in Rs values that were 4 to 13% greater than Rs values from PS in the first five cycles  
362 (Figure 5, 6 and File S3). After five cycles, PS resulted in greater responses than all of the GS  
363 methods when training sets were not updated. If training sets were not updated after the initial  
364 evaluations of RILs and the genetic architectures consisted of 400 and 4289 QTL responsible for  
365 0.7 H in the initial sets of RILs, then RR and Bayesian GP models provided greater genetic  
366 responses than PS only in the first 2-3 cycles and thereafter PS demonstrated 5-50 % greater  
367 standardized genetic responses (File S3).

368 When the RR GP model is updated with data from up to 14 previous cycles of recurrent  
369 selection, the Rs values for selection on 40 simulated QTL responsible for 70% of phenotypic  
370 variability in the initial sets of RILs was 1.5 to 10% greater than PS for the first 10 cycles of  
371 recurrent selection, but after the 10<sup>th</sup> cycle it was similar to PS (Figure 5 and 7; File S3). For the  
372 same genetic architecture the Rs values from BB and BL with model updating were 14.4% and  
373 12% greater than PS respectively for the first five cycles of recurrent selection. After the fifth  
374 cycle PS resulted in greater Rs values. If the RR model is updated with data from up to 14  
375 previous cycles of recurrent selection, the responses to selection of RILs with 400 simulated

376 QTL responsible for 70% of phenotypic variability in the initial sets of RILs, then the  $R_s$  values  
377 were 3 to 15% greater than PS across all 40 cycles. The limits of response to selection using BB  
378 and BL models were 1 to 14% greater than PS for up to 20 cycles. If the RR model is updated  
379 with data from 14 previous cycles of recurrent selection, the  $R_s$  values with 4289 QTL were 10-  
380 15% greater than PS for 40 cycles (Figure 5 and 7; File S3). Likewise recurrent selection using  
381 BB and BL models resulted in greater responses than PS for 40 cycles (Figure 5 and 7; File S3).  
382 Similar, albeit distinctive, comparisons among outcomes from GP models with model updating  
383 for genetic architectures responsible for 0.3 of the phenotypic variance in the initial sets of RILs  
384 are described in File S4.

385 As noted, if GP models are not updated, PS provides greater responses than GS in the early  
386 cycles of recurrent selection, whereas if the parametric GP models are updated then for some  
387 combinations of treatment factors,  $R_s$  values are greater than PS across many cycles of recurrent  
388 selection.

389 In addition to comparing outcomes of PS with GS, we next consider comparisons of the  
390 evaluation metrics with and without updated training sets among the GS methods. When GP  
391 models are updated, RR models resulted in 10% greater response than RR without updating for  
392 40 simulated QTL responsible for 70% of phenotypic variability among RILs in the initial cycle.  
393 Model updating resulted in 30% and 60% greater responses for 400 and 4289 QTL respectively  
394 (Figure S14). Recurrent selection with updated BB models resulted in 4% greater  $R_s$  values than  
395 without updating for 40 QTL and resulted in 22% and 57% greater responses for 400 and 4289  
396 simulated QTL respectively (Figure S14). Recurrent selection with updated BL models resulted  
397 in 3% greater responses than without updating for 40 simulated QTL. If the genetic architecture  
398 consisted of 400 QTL and 4289 QTL, updated BL models resulted in 21% and 51% greater

399 responses respectively (Figure S14). SVMRBF when updated with training sets demonstrated no  
400 significant improvement in  $R_s$  values relative to SVMRBF without updating for all genetic  
401 architectures (Figure S14 and S15). If the genetic architecture explains only 30% of the  
402 phenotypic variability in the initial sets of RILs, the relative improvements in  $R_s$  values using  
403 updated training sets are greater than simulated QTL that explain 0.7 of the phenotypic variance  
404 (Figure S15). Percent gain in response in GS with model updating relative to response from GS  
405 without updating for forty cycles of selection are provided in File S5.

406 When GP models are not updated, Mgv were consistently greater with PS than the four GP  
407 models. Among GP models without updating, BB provided the best Mgv, while SVM-RBF had  
408 the smallest Mgv (Figure 8 and S16). When GP models are updated, the pattern depends mostly  
409 on the number of QTL. For initial population H values of both 0.7 and 0.3 and 40 simulated  
410 QTL, Mgv are similar for RR, Bayesian GP models and PS, whereas for 400 QTL, RR produces  
411 greater Mgv than PS and Bayesian GS methods. For 4289 QTL, RR and Bayesian models  
412 produce greater Mgv with PS. GS with SVMRBF produced the least desirable Mgv for 40, 400  
413 and 4289 QTL.

414 When GP models are updated, the standardized genotypic variance ( $S_{gv}$ ) declines at a rate  
415 similar to the rate of decrease when the models are not updated (Figure 9 and S17). Model  
416 updating significantly improved estimated prediction accuracies,  $r_{ps}$ , for all GP models except  
417 SVMRBF (Figure 10 and S18). Among RR and Bayesian GP models, model updating has a  
418 slightly larger impact on estimated accuracies with RR than with Bayesian GP models (Figure 10  
419 and S18). For all selection methods pairwise LD among markers on the same chromosome  
420 decreases across cycles of recurrent selection (Figure S19-S23). LD decreased slowest with PS  
421 (Figure S19). Decay of LD in early and late cycles of selection are similar among parametric GP

422 models and SVMRBF with relaxed selection intensities. By the 20<sup>th</sup> cycle of recurrent selection,  
423 LD approached zero for all selection methods and there was no evidence that selection methods  
424 affected linkage disequilibrium (LD) differentially in the earlier cycles. The rates of LD decay  
425 are lower when GP models are updated compared to GP models without updating (Figure S19-  
426 S23).

427 When GP models are not updated, rates and limits of response standardized to change in  
428 genotypic variance ( $R_sVar$ ) with RR and Bayesian GS methods are similar to PS for 40, 400 and  
429 4289 simulated QTL responsible for both 70% and 30% of phenotypic variability in the initial  
430 population. There are no significant differences among GS methods as well as among GS and PS  
431 for most treatment combinations. Both rates and limits of  $R_sVar$  are also comparable across the  
432 three nQTL and selection intensity levels. However, with top 10% selected fraction, PS  
433 demonstrated greater limits of  $R_sVar$  for 400 and 4289 QTL (Figure S24 and S25).

434 However when GP models are updated, the patterns of  $R_sVar$  are significantly different among  
435 GS methods and PS and are also dependent on nQTL, selection intensity and heritability (Figure  
436 S26 and S27). With 0.7 heritability, there are no significant difference in  $R_sVar$  among GS  
437 methods for 40 simulated QTL for top 1%, 2.5% and 10% selected fraction. Whereas for 400 and  
438 4289 QTL with top 2.5% and 10% selected fraction, RR GS method demonstrated greater limits  
439 of  $R_sVar$  followed by PS and Bayesian GS methods. Gain in  $R_sVar$  with RR GS is even larger  
440 for 0.3 H treatment with relaxed selection intensities (Figure S26 and S27). SVMRBF  
441 demonstrated the least limits of  $R_sVar$  for treatment combinations with and without model  
442 updating (Figure S24 -S27).

443 *Selection Intensity.* Truncation selection using selection intensities of 2.67 and 2.34 resulted in  
444 similar rapid responses across the early cycles of recurrent selection (Figure S28 – S31). These

445 selection intensities associated with selection of 1% and 2.5% top RIL's limited responses to the  
446 early cycles (first 10-20 cycles) for all combinations of selection methods and number of  
447 simulated QTL. In contrast a selection intensity of 1.75, associated with retaining top 10% of the  
448 RILs each cycle, provided continued opportunities for response to selection for additional cycles  
449 depending on the number of simulated QTL and selection method (Figure 5-7 and S11- S15).

450 Selection intensity also impacted the effectiveness of updating GP models. With relaxed  
451 selection intensity, the proportional gains are greater with model updating than without updating  
452 for the three parametric GP methods, whereas stringent selection intensities with model updating  
453 for these methods resulted in proportionally lower gains (Figure S14, S15 and S32 – S35).  
454 Percent gain in responses from GP model updating for all three selection intensities are described  
455 in File S6.

456 Mgv's also increased with the relaxed selection intensities and differences of Mgv's among GS  
457 methods due to selection intensities were affected by model updating (Figure 8, S16 and S36-  
458 S39). As expected, the standardized genotypic variance, Sgv, decreased rapidly with increasing  
459 selection intensities (Figure 9, S17, and S40–S43). However, model updating didn't have any  
460 significant effect on rate of decrease in Sgv. Coincident with the relationship between loss of Sgv  
461 and selection intensities, LD also decays with increasing selection intensities (Figure S19). In  
462 contrast to Sgv, the rates of loss of LD among the GS methods are slowed by including training  
463 sets that are updated (Figure S20-S23).

464 By adjusting selection intensity, genetic variance in the population can be maintained for longer  
465 number of cycles without contribution from other sources of variation such as mutation or  
466 migration. Rate of decrease in genetic variance increases with increasing selection intensity  
467 Relaxed selection intensity of top 10% showed the least rate of decay of genetic variance,

468 whereas selection with top 1.0% demonstrated the largest rate of decay of genetic variance  
469 (Figure 9, S17, S40 – S43).

470 The rates at which estimated prediction accuracies decline under relaxed selection intensities  
471 result are less than the loss with stringent selection intensities. As with other metrics, the impact  
472 of selection intensity on estimated predictions accuracies depend on the GS method, model  
473 updating, number of QTL and heritability. Differences among GP models with updating are most  
474 pronounced for high selection intensities, 4289 QTL and high heritability (Figure 10, S18, S44 -  
475 S47).

476 *Number of simulated QTL.* The number of simulated QTL had the largest consistent impact on  
477 differences among the response curves for  $R_s$  values and  $M_{gv}$ 's. This is most obvious by noting  
478 that the  $R_s$  values (Figure 5, S11, S28- S31) are as high as 80% of the maximum value of 200  
479 and reach the limit in less than ten cycles of recurrent selection if there are 40 simulated QTL. In  
480 contrast,  $R_s$  values are no greater than 40% of the maximum value of 200 and reach the limit in  
481 10-15 cycles of recurrent selection for most selection methods if there are 400 simulated QTL  
482 while  $R_s$  values are no greater than 15% of the maximum value and only begin to approach the  
483 limit after 20 cycles if there are 4289 simulated QTL (Figures 5, S11 and S28 – S31).

484 The loss of  $S_{gv}$ 's across cycles for the simulated number of QTL is consistent with the rate at  
485 which limits to response from selection are approached (Figure 9, S17, S41 -43). As genotypic  
486 variance is eliminated, response to selection approaches a limit. Likewise the estimated  
487 prediction accuracies approach zero as the genotypic variance approaches zero (Figure 10, S18  
488 ,S44 –S47) although the covariance between the two metrics depend on the other simulated  
489 factors.



490 *Heritability* Most of the differences in response metrics between the two simulated H values  
491 have been reported above. In summary,  $R_s$  values are greater for simulated QTL responsible for  
492 70% of the initial phenotypic variance than  $R_s$  values for all genetic architectures responsible for  
493 30% of the initial phenotypic variance (Figure 5 and S11). These trends are correlated with the  
494 other response metrics, in particular prediction accuracies of the GP models.

495 The loss of estimated prediction accuracies are greater with H values of 0.3 than 0.7 with relaxed  
496 selection intensities. Other combinations of selection intensity and heritability require model  
497 updating to provide reasonable GP model prediction accuracies and achieve greater responses  
498 across more cycles of selection. As we would expect, for all combinations of selection intensity  
499 and number of QTL, limits of response and loss of genotypic variance are greater with H values  
500 of 0.7 than 0.3 (Figure 10, S18, and S44 – S47).

501

502

## 503 **Discussion**

504 We did not use a coalescent process to establish a set of founders. Rather we used a set of  
505 publicly available founders to create a breeding population similar to that found in soybean  
506 variety development projects in the primary soybean production region of North America. In  
507 both academic and commercial soybean development projects it is not unusual to cross multiple  
508 lines to a single exceptional variety and generate 50 to 150 RILs from each cross. Of the 4289  
509 SNP markers with genotypic scores for the SoyNAM population 3818 were polymorphic among  
510 the 20 families that were used as founders for the simulations. On average, 773 were  
511 polymorphic within a family with a variance among families of 34 polymorphic loci. In the  
512 initial founding set of RILs, the average heterozygosity per SNP locus across 20 families was  
513 0.09. The average estimated  $G_{st}$  value across the genome for the initial founding set of RILs from  
514 20 families was 0.32. ‘ $G_{st}$ ’ is a measure of sub-population differentiation estimated as ratio of  
515 difference between sub population expected heterozygosity and total expected heterozygosity to  
516 total expected heterozygosity (Jombart 2008; Ryman and Leimar 2009; Jombart and Ahmed  
517 2011). Relative to previous reported founders in self-pollinated crops derived using a coalescent  
518 process, our simulations began with a structure more likely to be found in actual soybean  
519 breeding populations and with much less, albeit more realistic, genetic diversity.

520 Recurrent selection was conducted in the context of a cultivar development process in which  
521 RILs are created and phenotypically evaluated each cycle. Field evaluations of replicated RILs  
522 provide information on the repeatable performance of RIL’s across environments before they are  
523 used for creating a new cycle of genetic improvement. Comparisons among selection methods  
524 assumed equal time required to develop and evaluate RIL’s for each cycle of recurrent selection.  
525 In practice, one of the advantages of using recurrent GS relative to recurrent PS is that

526 response/per year will be greater with GS. Even if both GS and PS require the same amount of  
527 time to develop RILs, selection with GS methods can be conducted without multiple years of  
528 phenotypic evaluations (Heffner et al. 2009).

529 An alternative recurrent selection strategy is to decouple genetic improvement from variety  
530 development (Gaynor et al. 2017). By separating the two types of breeding projects, GS can be  
531 applied every generation using training sets composed of genotypic and phenotypic data obtained  
532 on RILs derived in a previous cycle of recurrent selection. The consequence of using GP models  
533 to select and cross individual F1 plants instead of RILs should be to create more opportunities for  
534 recombination. In such a system training sets are updated with data obtained at regular intervals  
535 from annual field trials, although the training sets may be several selection cycles removed from  
536 the cycle used to create the RILs used in current field evaluations. Implementing such a two part  
537 strategy in soybean would require significant changes. In particular, intercrossing soybeans is  
538 labor intensive and expensive. Therefore, a two part system that requires intercrossing individual  
539 plants, rather than replicable lines, three times per year will require significant investments.  
540 Whether such investments can be justified will need to be investigated. The results reported  
541 herein provide a basis for comparing alternative breeding strategies with the established  
542 strategies for genetic improvement and cultivar development.

543 We simulated only simple additive genetic architectures. Alleles at adjacent QTL were assigned  
544 alternating positive genotypic values to alleles from each founder. Also recognize that some  
545 marker alleles are identical to the QTL alleles. Thus loss of prediction accuracies across cycles is  
546 not due to loss of LD, rather it is entirely due to loss of genotypic variance. Thus, the results  
547 indicate best case scenarios for implementation of GS methods. For experimental applications of  
548 GS, maintaining relationships among RILs in selected populations and LD between marker-QTL

549 will help maintain prediction accuracy even when the genotypic variance is reduced in later  
550 cycles of selection (Meuwissen 1997; Zhong et al. 2009; Wimmer et al. 2013; Müller et al. 2017,  
551 2018).

552 Based on estimates of the number of effectively segregating genomic segments among RILs 400  
553 and 4289 simulated QTL were associated with only about 40 and 400 effective haplotype blocks  
554 respectively (data not shown). The reduced number of effective linkage blocks means that the net  
555 magnitude of the allelic effects for each linkage block is less than for the case with 40 simulated  
556 QTL. For example by summing +/- alleles across a linkage block consisting of five QTL the  
557 simulated genetic effects will be  $2a (+ - + - +)$  or  $-2a (- + - + -)$ . Because the maximum net effect  
558 is 200 units regardless of the number of QTL, a large number of linkage blocks with small net  
559 effects requires more recombination for RILs in the population to realize the genetic potential of  
560 the founders. Hence we hypothesize if GS is applied to individuals in every generation such as  
561 proposed by (Gaynor et al. 2017) the increased recombination will effectively release useful  
562 genetic variability that is locked up in linkage blocks when RIL's are used as the selection units.

563 Our simulations also used constant values of non-genetic variance to produce phenotypic  
564 variance every cycle. While it is possible to simulate constant values of  $H$ , rather than  $\sigma_e$ , across  
565 all cycles of selection, the translation of such simulated values to experimental field plots is  
566 equivalent to planting (exponentially) increasing numbers of field plots as the genotypic variance  
567 decreases. Because closed soybean genetic improvement programs cannot afford to increase the  
568 number of plots to offset the loss of genotypic variance, we decided that it would be more  
569 realistic to assume that the non-genetic variance rather than  $H$  will be constant over cycles of  
570 recurrent selection.

571 *Modeled genotypic responses across 40 cycles of recurrent selection.* The use of a first order  
572 recurrence equation (3) to model genotypic responses (Rs) to recurrent selection provided a  
573 method for comprehensive analyses of variance including interactions among the combinations  
574 of factors. Curiously, we have not been able to find previous applications of recurrence  
575 equations to model responses from genomic selection methods in the literature. We hope that  
576 our explanation of how to implement such models in available R packages will encourage others  
577 to investigate the dynamics of recurrent selection across multiple cycles in both closed and open  
578 genetic populations.

579 Prediction accuracies of GP models trained with founder populations are consistent with  
580 prediction accuracies observed in previous studies (Habier et al. 2007; Goddard 2009; Howard et  
581 al. 2014). Prediction accuracies of RR and Bayesian methods with the population structure and  
582 genomic architecture created with SoyNAM founders are similar to previously reported  
583 accuracies for additive genetic architectures responsible for 0.7 and 0.3 of the phenotypic  
584 variance while the non-parametric SVM-RBF model produced the least accurate predictions  
585 from the founding sets of RILs (Habier et al. 2007; Howard et al. 2014).

586 The numbers of QTL also impacted prediction accuracy, with greater prediction accuracies for  
587 smaller numbers of QTL and a given training set size. With large numbers of QTL and smaller  
588 simulated additive effects, larger training sets are required to maintain similar levels of accuracy  
589 as compared to small number of QTL with large additive effects (Goddard 2009; Dekkers 2010).

590 *Comparisons of Selection Methods.* The comparisons of GS methods using all metrics suggest  
591 that RR when updated with training data from prior cycles will provide the best long-term  
592 response to selection in a closed breeding population derived from founders of SoyNAM.  
593 Without updating the models using training data from prior cycles, responses to recurrent

594 selection using parametric GS methods are greater than PS in early cycles, but are not better in  
595 later cycles, which is of concern for closed population improvement. RR models that use updated  
596 training sets achieve greater responses than Bayesian GP models and PS in both the early and  
597 late cycles of recurrent selection, whereas Bayesian GP models, when updated, result in greater  
598 responses than PS only in the early cycles. With relaxed selection intensities and large number of  
599 QTL, it is possible to achieve similar or greater limits of response than PS with RR and Bayesian  
600 GS methods with updating without compromising on rate of response with GS in early cycles  
601 given certain conditions.

602 It has been suggested that long-term response in GS will never be greater than PS because PS  
603 maintains genotypic variance for a longer number of cycles of recurrent selection (Goddard  
604 2009; Zhong et al. 2009; Jannink 2010). First, prediction accuracies of GS methods will decrease  
605 with every cycle of selection, whereas decay of prediction accuracies is irrelevant for PS.  
606 Second, GS results in rapid loss of genetic variance in the initial cycles, which results in  
607 approaching the asymptotic response limit in early cycles. However, response per cycle in the  
608 breeder's equation is also dependent on other factors such as selection intensity and loss of  
609 standardized genotypic variance in addition to prediction accuracy. Depending on other factors,  
610 GS still has the potential to realize greater gains for some treatments.

611 Model updating with training sets from prior cycles improves the relationship between training  
612 sets and validation sets compared to responses to GS without updated training sets resulting in  
613 greater prediction accuracies for RR GS method in late cycles of recurrent selection. Model  
614 updating also resulted in greater responses standardized to the rate of decrease of genetic  
615 variance in selected populations with updated RR GP models. Response standardized to change

616 in genotypic variance is very similar to efficiency of converting lost genetic diversity into genetic  
617 gain discussed by Gorjanc et al (Gorjanc G et al. 2018).

618 Instead of estimating efficiency as a slope of genetic gain regressed linearly on change in  
619 genotypic variance, we evaluated the non-linear pattern of changes. Given similar rates of  
620 decrease of genetic variance among RR and Bayes GS methods, the differences in responses  
621 among methods is possibly due to greater efficiency of translating loss of genetic diversity to  
622 gain with RR GS in later cycles of selection, although for most treatment factors the limits of  
623 response with RR and Bayesian GS methods are about the same.

624 It is not clear from our examination of patterns of relationship among selected lines and LD  
625 decay why prediction accuracies are greater in late cycles for RR compared to Bayesian methods  
626 when GP models are updated. Even though model updating resulted in significantly different  
627 rates of change of genotypic variance in selected populations, average heterozygosity, rate of  
628 inbreeding and rate of LD decay relative to GS methods without updating, there are no  
629 significant differences among GS methods.

630 Selection increased linkage disequilibrium (LD) while decreasing genetic variance in early  
631 cycles of selection, whereas in late cycles, LD decayed due to recombination. In PS, LD is  
632 influenced mostly by selection intensity, whereas the effects of LD and linkage are complicated  
633 in GS. Prediction accuracies of GP models are dependent on LD among marker-QTL and affect  
634 selection of lines and genotypic variance of selected populations, which in turn affect prediction  
635 accuracies in subsequent cycles of selection. In addition to the factors investigated in this study  
636 additional forces can affect LD including selection, drift, epistasis, and GxE effects (Roze and  
637 Barton 2006; Hickey et al. 2014). From these data it is not clear which of these forces has the  
638 greatest impact on LD, but use of simulations could be used to address this question.

639 Partitioning the contribution of LD and linkage blocks to prediction accuracy could help estimate  
640 the contribution of each of these factors to prediction accuracy of GP models. However, it  
641 requires a design similar to that employed by (Müller et al. 2017, 2018) for synthetic  
642 populations. In their study, populations with unrelated training and prediction sets with LD and  
643 SNP based relationship estimates showed low prediction accuracy and low genetic response in  
644 recurrent GS. This is similar to GS without updating in this study. Whereas populations with  
645 relationship between training and prediction sets with LD and SNP based relationship estimates  
646 is similar to GS with model updating, which showed greater prediction accuracy and greater  
647 genetic response in both of their published studies.

648 The genetic covariance among cycles of RILs depends on the number of QTL and influences the  
649 number of prior cycles that needs to be included in the training data set. If the genetic covariance  
650 among cycles of RILs changes rapidly, then data from fewer prior cycles are needed for accurate  
651 genomic predictions. Small numbers of QTL with larger effects requires fewer prior cycles of  
652 data to achieve good prediction accuracies and responses, whereas large numbers of QTL each  
653 with smaller additive effects produced slower changes to the genetic co-variance structure among  
654 cycles and required training data from more prior cycles to maintain good prediction accuracies  
655 and responses.

656 The rate at which genetic variance is reduced from cycle to cycle depends on number of QTL,  
657 heritability, selection intensity and GS methods (Figures 9 and S16) and we could model the loss  
658 of genotypic variance using a first order recurrence equation (3). However, it is likely that the  
659 estimated genotypic variance from each cycle is underestimated because the covariance among  
660 QTL, due to LD among QTL, was not taken into account (Bulmer 1971, 1976; Lehermeier et al.



661 2017). None-the-less, the changes of genotypic variance from cycle to cycle mirrored the  
662 response of  $R_s$  and  $M_{gv}$ , decreasing to zero when the  $R_s$  and  $M_{gv}$  reached their limits.

663 We also assumed that the training set size increases with every cycle when we cumulatively add  
664 data from prior cycles to the training data set. Increasing training population size confounds  
665 estimation of effects of maintaining relationship between training and prediction sets on  
666 accuracy. But, there are some approaches to remedy this situation which still needs to be  
667 evaluated. One of the potential approaches is to randomly sample subsets of data from each of  
668 the prior cycles to maintain a constant cumulative training population size. It is also possible to  
669 assign weights to the samples from prior cycles to place more weight on data from more recent  
670 cycles. This essentially involves determining the optimal trade-off for sample sizes and weights  
671 that will assure maximum prediction accuracy with minimal computational requirements. Some  
672 aspects of this optimization problem have been addressed. Akdemir et al (2015) devised a  
673 genetic algorithm for selecting optimal training populations to minimize prediction error  
674 variance and Xavier et al (2017) developed sampling methods for training bayesian GP models.

675 Another approach is to retrain GP models at regular frequencies instead of updating every cycle,  
676 while maintaining a constant training population size. Application of sampling and optimization  
677 methods for selection of training populations for GP model updating requires further study in the  
678 context of recurrent genomic selection.

679 *Selection Intensity*. Replicated responses to high values of selection intensity quickly reach a  
680 limit in five to ten cycles of recurrent selection. Replicated responses to lower values of selection  
681 intensity consistently result in greater gains over more cycles, indicating that genetic drift is the  
682 most likely mechanism for loss of genotypic variance. These constraints on plant breeding  
683 programs are well characterized (Brisbane and Gibson 1995; Hayes et al. 2009; Jannink 2010;

684 Hung et al. 2012; Liu et al. 2015; Akdemir and Sánchez 2016; Yabe et al. 2016). The optimal  
685 trade-off between achieving genetic gains and maintaining genetic diversity depend on the  
686 objectives. For example, if the objective is to enter and capture market share in a short time  
687 frame, then maintenance of genetic diversity is not important.

688 Most simulation studies apply a constant selection intensity across cycles of selection. The  
689 effects of applying a dynamic selection strategy is an interesting problem. We hypothesize that a  
690 strategy consisting of applying different selection intensities, optimized for each cycle, will  
691 achieve improved long-term genetic response by differentially emphasizing genetic variance and  
692 genetic response across multiple cycles of selection.

## 693 **Conclusion**

694 Using simulations we examined the impact of five factors on genetic response through 40 cycles  
695 of recurrent selection in simulated Soybean populations for 306 unique combinations of  
696 treatment factors in a factorial design. Two of these factors, number of QTL and heritability are  
697 characteristics that the plant breeder cannot alter in a closed breeding population, whereas the  
698 plant breeder can alter selection intensity, GP models and GP model updating.

699 Interactions among the five factors significantly affect the rate of response and limits to selection  
700 response. Responses to selection approached a limit after 10 to 20 cycles of recurrent selection  
701 for most combinations of the five factors. If GP models are not updated after an initial training  
702 set, then bayesian parametric methods performed better than ridge-regression and machine  
703 learning methods in terms of prediction accuracy and limits of response to selection. If GP  
704 models are updated by re-training using current and prior cycles of genotypic and phenotypic  
705 data, then ridge regression models demonstrated greater prediction accuracies and limits of

706 responses. Relaxed selection intensity resulted in greater limits of responses but at slightly lower  
707 rates of genetic gain in early cycles compared to stringent selection intensities.

708 By utilizing a first order recurrence equation to model response to selection and evaluating  
709 factors that could affect the response to selection our results provide an objective framework for  
710 further investigations of selection methods for genetic improvement and line development  
711 projects in self-pollinated crops. For example, it has been suggested that the occasional  
712 emergence of a line with exceptional characteristics that dominate all other genotypes for several  
713 cycles of selection is likely due to a unique combination of genetic alleles, i.e., epistasis. If  
714 epistasis is simulated, will the first order recurrence equation be sufficiently robust to model  
715 response to selection? Second, we employed truncation selection with a crossing strategy that  
716 uses high contributions from top ranked RILs among the selected population of RILs in each of  
717 the simulated cycles of selection. We did not consider relationships among selected RILs nor the  
718 trade-offs between genetic gain, genetic variance (inbreeding) when selecting RILs to cross.

719 There exist multi-objective optimization breeding methods such as genomic mating and optimal  
720 cross selection (Rutten et al. 2002; Woolliams et al. 2015; Akdemir and Sánchez 2016; Gorjanc  
721 et al. 2018), that could provide both greater rates and limits of responses across cycles.

722 Importantly, we simulated a closed breeding population in which culled lines were not resampled  
723 for discarded favorable alleles, nor did we simulate a more open breeding population with  
724 exchange of lines among breeding programs. There are evolutionary algorithms such as island  
725 models with parameters that fit these more realistic breeding programs (Yabe et al. 2016).

726 Evaluation of these other types of selection strategies and design of hybrid strategies that  
727 incorporate elements of two or more distinct algorithmic approaches is a promising direction of  
728 exploration.

729

730

731 **Acknowledgements**

732 Funding for this research was provided by the Department of Agronomy, Iowa State University,  
733 the North Central Soybean Research Program and a grant (1830478) from the Engineering  
734 Directorate of NSF. Supplemental funding for large scale computing was enabled by the  
735 Extreme Science and Engineering Discovery Environment (XSEDE), which is supported by  
736 National Science Foundation. XSEDE resources consisted of research allocations (DMS190015  
737 & DMS190018) on PSC-Bridges Large Memory nodes for the parametric GP model update  
738 simulations. The Iowa State University -Pronto GPU cluster enabled computation of SVM model  
739 update simulations. We also want to acknowledge Matheus de Krause for discussions on fitting  
740 non-linear models using ‘nlme’ package, Lizhi Wang for efficient programs to simulate meiosis  
741 and Alencar Xavier for sharing an efficient expectation maximization method for fitting ridge  
742 regression GP models.

743

744

745

746

747

## Reference

Akdemir D, Sánchez JI: **Efficient Breeding by Genomic Mating**. *Frontiers in Genetics* 2016, **7**.

Akdemir D, Sanchez JI, Jannink JL: **Optimization of genomic selection training populations with a genetic algorithm**. *Genet Sel Evol* 2015, **47**:38.

Bassi FM, Bentley AR, Charmet G, Ortiz R, Crossa J: **Breeding schemes for the implementation of genomic selection in wheat (*Triticum* spp.)**. *Plant Science* 2016, **242**:23-36.

Bastiaansen JWM, Coster A, Calus MPL, van Arendonk JAM, Bovenhuis H: **Long-term response to genomic selection: effects of estimation method and reference population structure for different genetic architectures**. *Genetics Selection Evolution* 2012, **44**:3.

Baty F, Ritz C, Charles S, Brutsche M, Flandrois J-P, Delignette-Muller M-L: **A Toolbox for Nonlinear Regression in R: The Package nlstools**. *Journal of Statistical Software; Vol 1, Issue 5 (2015)* 2015.

Bernardo R: **Molecular Markers and Selection for Complex Traits in Plants: Learning from the Last 20 Years**. *Crop Science* 2008, **48**:1649.

Bernardo R: **Genomewide Selection of Parental Inbreds: Classes of Loci and Virtual Biparental Populations**. *Crop Science* 2014, **54**:2586.

Bernardo R, Yu J: **Prospects for Genomewide Selection for Quantitative Traits in Maize**. *Crop Science* 2007, **47**:1082-1090.

Bertan I, Carvalho F, Oliveira Ad: **Parental selection strategies in plant breeding programs**. *J Crop Sci Biotechnol* 2007, **10**:211-222.

Beyene Y, Semagn K, Mugo S, Tarekegne A, Babu R, Meisel B, Sehabiague P, Makumbi D, Magorokosho C, Oikeh S, et al: **Genetic gains in grain yield through genomic selection in eight bi-parental maize populations under drought stress.(RESEARCH)(Author abstract)**. 2015, **55**:154.

Bhatia VS, Singh P, Wani SP, Chauhan GS, Rao AVRK, Mishra AK, Srinivas K: **Analysis of potential yields and yield gaps of rainfed soybean in India using CROPGRO-Soybean model.(Report)**. *Agricultural and Forest Meteorology* 2008, **148**:1252.

Bijma P: **Long-term genomic improvement – new challenges for population genetics**. *Journal of Animal Breeding and Genetics* 2012, **129**:1-2.

Bos I: *Selection methods in plant breeding by Izak Bos and Peter Caligari*. 2nd ed.. edn. Dordrecht: Dordrecht : Springer; 2008.

Brisbane J, Gibson J: **Balancing selection response and rate of inbreeding by including genetic relationships in selection decisions.** *International Journal of Plant Breeding Research* 1995, **91**:421-431.

Bulmer MG: **The Effect of Selection on Genetic Variability.** *The American Naturalist* 1971, **105**:201-211.

Bulmer MG: **The effect of selection on genetic variability: a simulation study.** *Genet Res* 1976, **28**:101-117.

Cochran WG: **Improvement by Means of Selection.** In *Proceedings of the Second Berkeley Symposium on Mathematical Statistics and Probability; 1951; Berkeley, Calif.* University of California Press; 1951: 449-470.

Comeron JM, Williford A, Kliman RM: **The Hill-Robertson effect: evolutionary consequences of weak selection and linkage in finite populations.** *Heredity (Edinb)* 2008, **100**:19-31.

Cooper M, Podlich D, Micallef K, Smith O, Jensen N, Chapman S, Kruger N: **Complexity, quantitative traits and plant breeding: a role for simulation modelling in the genetic improvement of crops.** *Quantitative genetics, genomics and plant breeding' (Ed MS Kang) pp* 2002:143-166.

Crossa J, Pérez P, Hickey J, Burgueño J, Ornella L, Cerón-Rojas J, Zhang X, Dreisigacker S, Babu R, Li Y, et al: **Genomic prediction in CIMMYT maize and wheat breeding programs.** *Heredity* 2014, **112**:48-60.

Crow JF, Kimura M: **An introduction to population genetics theory.** *An introduction to population genetics theory* 1970.

De Los Campos G, Gianola D, Rosa GJM, Weigel KA, Crossa J: **Semi-parametric genomic-enabled prediction of genetic values using reproducing kernel Hilbert spaces methods.** *Genetics Research* 2010, **92**:295-308.

de los Campos G, Hickey JM, Pong-Wong R, Daetwyler HD, Calus MPL: **Whole-Genome Regression and Prediction Methods Applied to Plant and Animal Breeding.** *Genetics* 2013, **193**:327-345.

de los Campos G, Naya H, Gianola D, Crossa J, Legarra A, Manfredi E, Weigel K, Cotes JM: **Predicting Quantitative Traits With Regression Models for Dense Molecular Markers and Pedigree.** *Genetics* 2009, **182**:375-385.

de Los Campos G, Vazquez AI, Fernando R, Klimentidis YC, Sorensen D: **Prediction of complex human traits using the genomic best linear unbiased predictor.** *PLoS Genet* 2013, **9**:e1003608.

de Roos APW, Hayes BJ, Goddard ME: **Reliability of genomic predictions across multiple populations.** *Genetics* 2009, **183**:1545-1553.

Dekkers JCM: **Use of high-density marker genotyping for genetic improvement of livestock by genomic selection.** *CAB Reviews: Perspectives in Agriculture, Veterinary Science, Nutrition and Natural Resources* 2010, **5**:1-13.

Dekkers JCM: **Application of Genomics Tools to Animal Breeding.** *Current Genomics* 2012, **13**:207-212.

Diers BW, Specht J, Rainey KM, Cregan P, Song Q, Ramasubramanian V, Graef G, Nelson R, Schapaugh W, Wang D, et al: **Genetic Architecture of Soybean Yield and Agronomic Traits.** *G3: Genes/Genomes/Genetics* 2018, **8**:3367.

Emily C, Rex B: **Accuracy of Genomewide Selection for Different Traits with Constant Population Size, Heritability, and Number of Markers.** *The Plant Genome* 2013, **6**.

Endelman JB: **Ridge Regression and Other Kernels for Genomic Selection with R Package rrBLUP.** *The Plant Genome Journal* 2011, **4**:250.

Fehr W: **Principles of cultivar development: theory and technique.** Macmillian Publishing Company; 1991.

Felsenstein J: **The Effect of Linkage on Directional Selection.** *Genetics* 1965, **52**:349.

Felsenstein J: **The Evolutionary Advantage of Recombination.** *Genetics* 1974, **78**:737.

Franco GA, Mark AN, William DB, Scott MP, Jean-Luc J: **Accuracy and Training Population Design for Genomic Selection on Quantitative Traits in Elite North American Oats.** *The Plant Genome* 2011, **4**:132-144.

Gao N, Li J, He J, Xiao G, Luo Y, Zhang H, Chen Z, Zhang Z: **Improving accuracy of genomic prediction by genetic architecture based priors in a Bayesian model.** *BMC Genet* 2015, **16**:120.

Goddard M: **Genomic selection: prediction of accuracy and maximisation of long term response.** *Genetica* 2009, **136**:245-257.

Goiffon M, Kusmec A, Wang L, Hu G, Schnable PS: **Improving Response in Genomic Selection with a Population-Based Selection Strategy: Optimal Population Value Selection.** *Genetics* 2017, **206**:1675.

Goldberg S: *Introduction to difference equations, with illustrative examples from economics, psychology, and sociology.* New York: New York, Wiley; 1958.

Gorjanc G, Gaynor RC, Hickey JM: **Optimal cross selection for long-term genetic gain in two-part programs with rapid recurrent genomic selection.** *Theoretical and Applied Genetics* 2018, **131**:1953-1966.

Grant D, Nelson RT, Cannon SB, Shoemaker RC: **SoyBase, the USDA-ARS soybean genetics and genomics database.** *Nucleic acids research* 2010, **38**:D843.



Guo B, Sleper DA, Beavis WD: **Nested Association Mapping for Identification of Functional Markers.** *Genetics* 2010, **186**:373-383.

Guo Z, Tucker DM, Lu J, Kishore V, Gay G: **Evaluation of genome-wide selection efficiency in maize nested association mapping populations.** *Theoretical and Applied Genetics* 2012, **124**:261-275.

Habier D, Fernando RL, Dekkers JCM: **The Impact of Genetic Relationship Information on Genome-Assisted Breeding Values.** *Genetics* 2007, **177**:2389.

Hagan S, Knowles J, Kell DB: **Exploiting Genomic Knowledge in Optimising Molecular Breeding Programmes: Algorithms from Evolutionary Computing (Evolutionary Computing for Molecular Breeding).** 2012, **7**:e48862.

Hayes BJ, Visscher PM, Goddard ME: **Increased accuracy of artificial selection by using the realized relationship matrix.** *Genetics Research* 2009, **91**:47-60.

Heffner EL, Jannink J-L, Iwata H, Souza E, Sorrells ME: **Genomic selection accuracy for grain quality traits in biparental wheat populations.(RESEARCH)(Author abstract)(Report).** *Crop Science* 2011, **51**:2597.

Heffner EL, Sorrells ME, Jannink J-L: **Genomic Selection for Crop Improvement.** *Crop Science* 2009, **49**:1.

Henryon M, Berg P, Sørensen AC: **Animal-breeding schemes using genomic information need breeding plans designed to maximise long-term genetic gains.** *Livestock Science* 2014, **166**:38-47.

Heslot N, Akdemir D, Sorrells ME, Jannink J-L: **Integrating environmental covariates and crop modeling into the genomic selection framework to predict genotype by environment interactions.** *Theoretical and Applied Genetics* 2014, **127**:463-480.

Heslot N, Jannink J-L, Sorrells ME: **Perspectives for Genomic Selection Applications and Research in Plants.** *Crop Science* 2015, **55**:1-12.

Heslot N, Yang H-P, Sorrells ME, Jannink J-L: **Genomic Selection in Plant Breeding: A Comparison of Models.** *Crop Science* 2012, **52**:146-160.

Hickey JM, Chiurugwi T, Mackay I, Powell W: **Genomic prediction unifies animal and plant breeding programs to form platforms for biological discovery.** *Nature genetics* 2017, **49**:1297.

Hickey JM, Dreisigacker S, Crossa J, Hearne S, Babu R, Prasanna BM, Grondona M, Zambelli A, Windhausen VS, Mathews K, Gorjanc G: **Evaluation of genomic selection training population designs and genotyping strategies in plant breeding programs using simulation.(RESEARCH)(Author abstract).** 2014, **54**:1476.

Hickey JM, Dreisigacker S, Crossa J, Hearne S, Babu R, Prasanna BM, Grondona M,



Zambelli A, Windhausen VS, Mathews K, Gorjanc G: **Evaluation of Genomic Selection Training Population Designs and Genotyping Strategies in Plant Breeding Programs Using Simulation.** *Crop Science* 2014, **54**:1476-1488.

Hill WG, Robertson A: **The effect of linkage on limits to artificial selection.** *Genetics Research* 2008, **89**:311-336.

Howard R, Beavis WD, Carriquiry A: **Evaluation of a Computational Diagnostic for Epistasis in Plant Breeding Populations.** *bioRxiv* 2016.

Howard R, Carriquiry AL, Beavis WD: **Parametric and nonparametric statistical methods for genomic selection of traits with additive and epistatic genetic architectures.** *G3 (Bethesda)* 2014, **4**:1027-1046.

Howard R, Carriquiry AL, Beavis WD: **Application of Response Surface Methods To Determine Conditions for Optimal Genomic Prediction.** *G3: Genes/Genomes/Genetics* 2017, **7**:3103.

Hung HY, Browne C, Guill K, Coles N, Eller M, Garcia A, Lepak N, Melia-Hancock S, Oropeza-Rosas M, Salvo S, et al: **The relationship between parental genetic or phenotypic divergence and progeny variation in the maize nested association mapping population.** *Heredity (Edinb)* 2012, **108**:490-499.

Jannink J-L: **Dynamics of long-term genomic selection.** *Genetics Selection Evolution* 2010, **42**:35.

Jannink JL: **Selection dynamics and limits under additive X additive epistatic gene action.** *Crop science* 2003, v. **43**:pp. 489-497-2003 v.2043 no.2002.

Jannink JL, Lorenz AJ, Iwata H: **Genomic selection in plant breeding: from theory to practice.** *Brief Funct Genomics* 2010, **9**:166-177.

Jarquín D, Howard R, Xavier A, Das Choudhury S: **Increasing Predictive Ability by Modeling Interactions between Environments, Genotype and Canopy Coverage Image Data for Soybeans.** *Agronomy* 2018, **8**:51.

Jarquín D, Specht J, Lorenz A: **Prospects of Genomic Prediction in the USDA Soybean Germplasm Collection: Historical Data Creates Robust Models for Enhancing Selection of Accessions.** *G3: Genes/Genomes/Genetics* 2016.

Jombart T: **adegenet: a R package for the multivariate analysis of genetic markers.** *Bioinformatics* 2008, **24**:1403-1405.

Jombart T, Ahmed I: **adegenet 1.3-1: new tools for the analysis of genome-wide SNP data.** *Bioinformatics* 2011, **27**:3070-3071.

Jonas E, de Koning D-J: **Does genomic selection have a future in plant breeding?** *Trends in Biotechnology* 2013, **31**:497-504.

Jonas E, de Koning DJ: **Goals and hurdles for a successful implementation of genomic selection in breeding programme for selected annual and perennial crops.** *Biotechnology & genetic engineering reviews* 2016, **32**:18.

Kimura M: **Attainment of Quasi Linkage Equilibrium When Gene Frequencies are Changing by Natural Selection.** *Genetics* 1965, **52**:875.

Lehermeier C, de los Campos G, Wimmer V, Schön CC: **Genomic variance estimates: With or without disequilibrium covariances?** *Journal of Animal Breeding and Genetics* 2017, **134**:232-241.

Li Y, Kadarmideen HN, Dekkers JCM: **Selection on multiple QTL with control of gene diversity and inbreeding for long-term benefit.** *Journal of Animal Breeding and Genetics* 2008, **125**:320-329.

Liu H, Meuwissen TH, Sorensen AC, Berg P: **Upweighting rare favourable alleles increases long-term genetic gain in genomic selection programs.** *Genet Sel Evol* 2015, **47**:19.

Liu H, Sørensen AC, Meuwissen THE, Berg P: **Allele frequency changes due to hitchhiking in genomic selection programs.** *Genetics Selection Evolution* 2014, **46**:8.

Liu X, Wang H, Wang H, Guo Z, Xu X, Liu J, Wang S, Li W-X, Zou C, Prasanna BM, et al: **Factors affecting genomic selection revealed by empirical evidence in maize.** *The Crop Journal* 2018.

Liu Z, Yang X, Lin X, Hubbard K, Lv S, Wang J: **Maize yield gaps caused by non-controllable, agronomic, and socioeconomic factors in a changing climate of Northeast China.** *Science of The Total Environment* 2016, **541**:756-764.

Long N, Gianola D, Rosa GJM, Weigel KA: **Application of support vector regression to genome-assisted prediction of quantitative traits.** *Theoretical and Applied Genetics* 2011, **123**:1065.

Long N, Gianola D, Rosa GJM, Weigel KA, Kranis A, González-Recio O: **Radial basis function regression methods for predicting quantitative traits using SNP markers.** *Genetics Research* 2010, **92**:209-225.

Lopez-Cruz M, Crossa J, Bonnett D, Dreisigacker S, Poland J, Jannink J-L, Singh RP, Autrique E, de los Campos G: **Increased Prediction Accuracy in Wheat Breeding Trials Using a Marker × Environment Interaction Genomic Selection Model.** *G3: Genes/Genomes/Genetics* 2015, **5**:569.

Lorenz AJ: **Resource Allocation for Maximizing Prediction Accuracy and Genetic Gain of Genomic Selection in Plant Breeding: A Simulation Experiment.** *G3: Genes/Genomes/Genetics* 2013, **3**:481.

Lorenz AJ, Smith KP, Jannink J-L: **Potential and Optimization of Genomic Selection for**

**Fusarium Head Blight Resistance in Six-Row Barley.** *Crop Science* 2012, **52**:1609-1621.

Marulanda J, Mi X, Melchinger A, Xu J-L, Würschum T, Longin C: **Optimum breeding strategies using genomic selection for hybrid breeding in wheat, maize, rye, barley, rice and triticale.** *Theor Appl Genet* 2016, **129**:1901-1913.

Matei G, Woyann LG, Milioli AS, de Bem Oliveira I, Zdziarski AD, Zanella R, Coelho ASG, Finatto T, Benin G: **Genomic selection in soybean: accuracy and time gain in relation to phenotypic selection.** *Molecular Breeding* 2018, **38**:117.

Maynard J, Haigh J: **The hitch-hiking effect of a favourable gene.** *Genetics Research* 2008, **89**:391-403.

Meuwissen T, Hayes B, Goddard M: **Prediction of total genetic value using genome-wide dense marker maps.** *Genetics* 2001, **157**:1819-1829.

Meuwissen T, Hayes B, Goddard M: **Accelerating improvement of livestock with genomic selection.** *Annu Rev Anim Biosci* 2013, **1**:221-237.

Meuwissen TH: **Maximizing the response of selection with a predefined rate of inbreeding.** *Journal of animal science* 1997, **75**:934-940.

Meuwissen TH, Goddard ME: **Mapping multiple QTL using linkage disequilibrium and linkage analysis information and multitrait data.** *Genetics Selection Evolution* 2004, **36**:261.

Michel S, Ametz C, Gungor H, Epure D, Grausgruber H, Loschenberger F, Buerstmayr H: **Genomic selection across multiple breeding cycles in applied bread wheat breeding.(Original Article)(Report).** *Theoretical and Applied Genetics* 2016, **129**:1179.

Mikel MA, Diers BW, Nelson RL, Smith HH: **Genetic Diversity and Agronomic Improvement of North American Soybean Germplasm.** *Crop Science* 2010, **50**:1219-1229.

Montesinos-López OA, Martín-Vallejo J, Crossa J, Gianola D, Hernández-Suárez CM, Montesinos-López A, Juliana P, Singh R: **A Benchmarking Between Deep Learning, Support Vector Machine and Bayesian Threshold Best Linear Unbiased Prediction for Predicting Ordinal Traits in Plant Breeding.** *G3: Genes/Genomes/Genetics* 2019, **9**:601.

Müller D, Schopp P, Melchinger AE: **Persistency of Prediction Accuracy and Genetic Gain in Synthetic Populations Under Recurrent Genomic Selection.** *G3: Genes/Genomes/Genetics* 2017, **7**:801.

Müller D, Schopp P, Melchinger AE: **Selection on Expected Maximum Haploid Breeding Values Can Increase Genetic Gain in Recurrent Genomic Selection.** *G3: Genes/Genomes/Genetics* 2018, **8**:1173.

Nagylaki T: **The evolution of one- and two-locus systems.** *Genetics* 1976, **83**:583.

Nakaya A, Isobe SN: **Will genomic selection be a practical method for plant breeding?** *Annals of Botany* 2012, **110**:1303-1316.

Norman A, Taylor J, Edwards J, Kuchel H: **Optimising Genomic Selection in Wheat: Effect of Marker Density, Population Size and Population Structure on Prediction Accuracy.** *G3: Genes/Genomes/Genetics* 2018.

Ortiz-Perez E, Cianzio SR, Wiley H, Horner HT, Davis WH, Palmer RG: **Insect-mediated cross-pollination in soybean [*Glycine max* (L.) Merrill] : I. Agronomic performance.** Iowa State University Digital Repository; 2007.

Pérez P, de los Campos G: **Genome-Wide Regression and Prediction with the BGLR Statistical Package.** *Genetics* 2014, **198**:483-495.

Pinheiro JC: **Mixed-effects models in S and S-PLUS** / José C. Pinheiro, Douglas M. Bates. New York: New York : Springer; 2000.

Ray J, Kilen T, Abel C, Paris R: **Soybean natural cross-pollination rates under field conditions.** *Environmental biosafety research* 2003, **2**:133-138.

Riedelsheimer C, Melchinger AE: **Optimizing the allocation of resources for genomic selection in one breeding cycle.** *Theoretical and Applied Genetics* 2013, **126**:2835+.

Rincker K, Nelson R, Specht J, Sleper D, Cary T, Cianzio SR, Casteel S, Conley S, Chen P, Davis V, et al: **Genetic Improvement of U.S. Soybean in Maturity Groups II, III, and IV.** *Crop Science* 2014, **0**:0.

Robertson A: **A Theory of Limits in Artificial Selection.** *Proceedings of the Royal Society of London Series B Biological Sciences* 1960, **153**:234.

Roze D, Barton NH: **The Hill–Robertson Effect and the Evolution of Recombination.** *Genetics* 2006, **173**:1793-1811.

Rutkoski J, Singh RP, Huerta-Espino J, Bhavani S, Poland J, Jannink JL, Sorrells ME: **Genetic Gain from Phenotypic and Genomic Selection for Quantitative Resistance to Stem Rust of Wheat.** *The Plant Genome* 2015, **8**.

Rutten MJM, Bijma P, Woolliams JA, van Arendonk JAM: **SelAction: Software to Predict Selection Response and Rate of Inbreeding in Livestock Breeding Programs.** *Journal of Heredity* 2002, **93**:456-458.

Ryman N, Leimar O: **GST is still a useful measure of genetic differentiation — a comment on Jost's D.** *Molecular Ecology* 2009, **18**:2084-2087.

Sukumaran S, Crossa J, Jarquin D, Lopes M, Reynolds MP: **Genomic Prediction with Pedigree and Genotype × Environment Interaction in Spring Wheat Grown in South and West Asia, North Africa, and Mexico.** *G3: Genes/Genomes/Genetics* 2017, **7**:481.

Takuno S, Terauchi R, Innan H: **The power of QTL mapping with RILs.** *PLoS One* 2012, **7**:e46545.

van Ittersum MK, Cassman KG, Grassini P, Wolf J, Tittone P, Hochman Z: **Yield gap analysis with local to global relevance—A review.** *Field Crops Research* 2013, **143**:4-17.

Wang Z, Chu T, Choate L, Danko C: **Rgtsvm: Support Vector Machines on a GPU in R.** 2017.

Wimmer V, Lehermeier C, Albrecht T, Auinger H-J, Wang Y, Schön C-C: **Genome-Wide Prediction of Traits with Different Genetic Architecture Through Efficient Variable Selection.** *Genetics* 2013, **195**:573.

Woolliams JA, Berg P, Dagnachew BS, Meuwissen TH: **Genetic contributions and their optimization.** *J Anim Breed Genet* 2015, **132**:89-99.

Xavier A: **Efficient Estimation of Marker Effects in Plant Breeding.** *G3: Genes/Genomes/Genetics* 2019, **9**:3855.

Xavier A, Jarquin D, Howard R, Ramasubramanian V, Specht JE, Graef GL, Beavis WD, Diers BW, Song Q, Cregan P, et al: **Genome-Wide Analysis of Grain Yield Stability and Environmental Interactions in a Multiparental Soybean Population.** *G3: Genes/Genomes/Genetics* 2017.

Xavier A, Xu S, Muir W, Rainey KM: **Genomic prediction using subsampling.** *BMC Bioinformatics* 2017, **18**:191.

Xu Y, Li P, Zou C, Lu Y, Xie C, Zhang X, Prasanna BM, Olsen MS: **Enhancing genetic gain in the era of molecular breeding.** *Journal of Experimental Botany* 2017, **68**:2641-2666.

Yabe S, Yamasaki M, Ebana K, Hayashi T, Iwata H: **Island-Model Genomic Selection for Long-Term Genetic Improvement of Autogamous Crops.** *PLoS One* 2016, **11**:e0153945.

Yu J, Buckler ES: **Genetic association mapping and genome organization of maize.** *Curr Opin Biotechnol* 2006, **17**:155-160.

Yu J, Holland JB, McMullen MD, Buckler ES: **Genetic Design and Statistical Power of Nested Association Mapping in Maize.** *Genetics* 2008, **178**:539.

Zhong S, Dekkers JCM, Fernando RL, Jannink J-L: **Factors Affecting Accuracy From Genomic Selection in Populations Derived From Multiple Inbred Lines: A Barley Case Study.** *Genetics* 2009, **182**:355-364.

## Figures

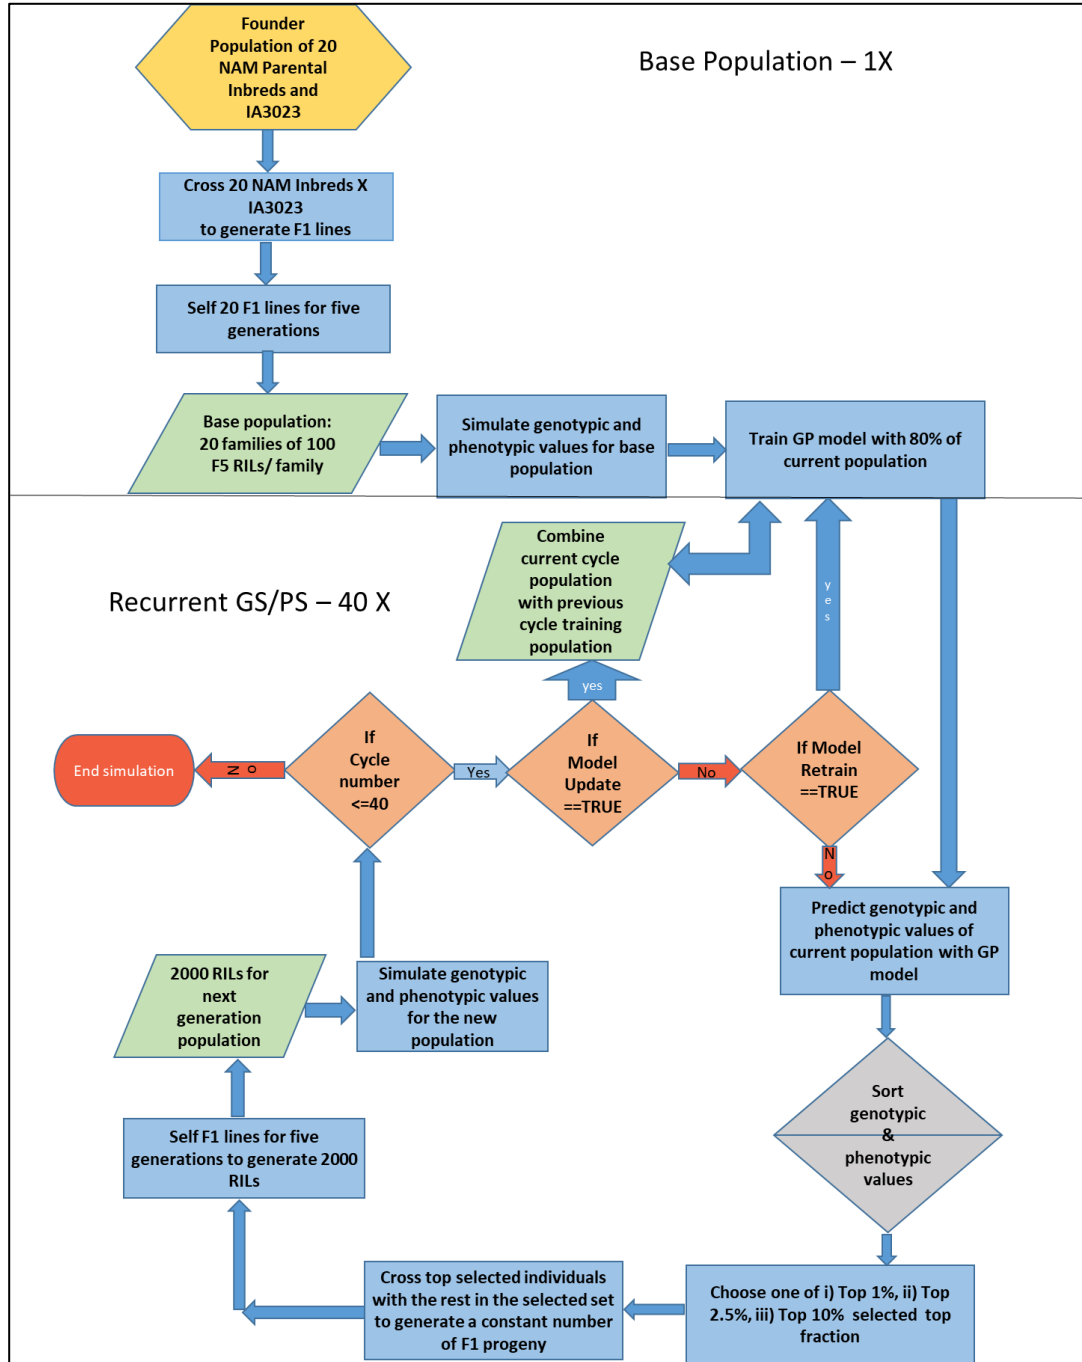

**Figure 1 Flow Chart for Simulations of Recurrent Genomic Selection.** The upper half panel represents the steps involved in generating the base population of 2000 F<sub>5</sub> RILs derived from 20 NAM founder lines crossed, *in silico*, to IA3023. It includes the model training step for genomic prediction models. The lower half panel represents recurrent steps of prediction, sorting, truncation selection, crossing, and generation of F<sub>5</sub> RILs for each cycle as well as the decision steps to check if the training set should be updated and if the recurrent process is to be continued for another cycle.

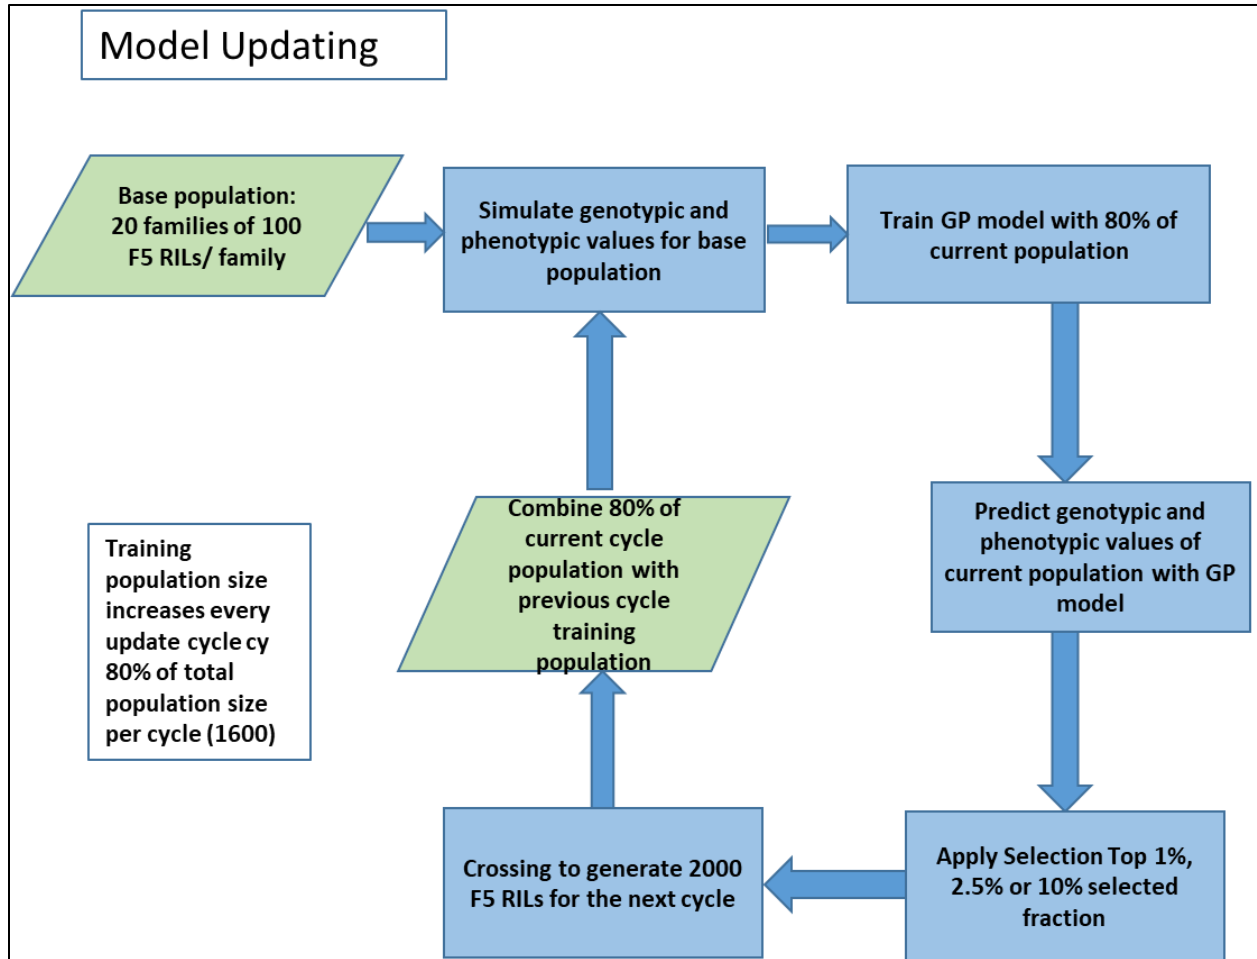

**Figure 2 Flow Chart for Model Updating in Simulations of Recurrent Genomic Selection.** Model updating involves combining training data from 'n-1' previous cycles (t-n-1...t-1) with training data from the t<sup>th</sup> cycle to retrain genomic prediction models. 't' refers to the selection cycle and ranges from 1 to 40 and 'n' refers to number of prior cycles that are included in the training set. The treatment design has four levels for 'n' ranging from 0 - 14. 'n=0' refers to no updating, whereas 'n= 10', 'n=12' and 'n=14' refer to inclusion of training data from 9, 11 and 13 prior cycles along with data from t<sup>th</sup> cycle of selection.



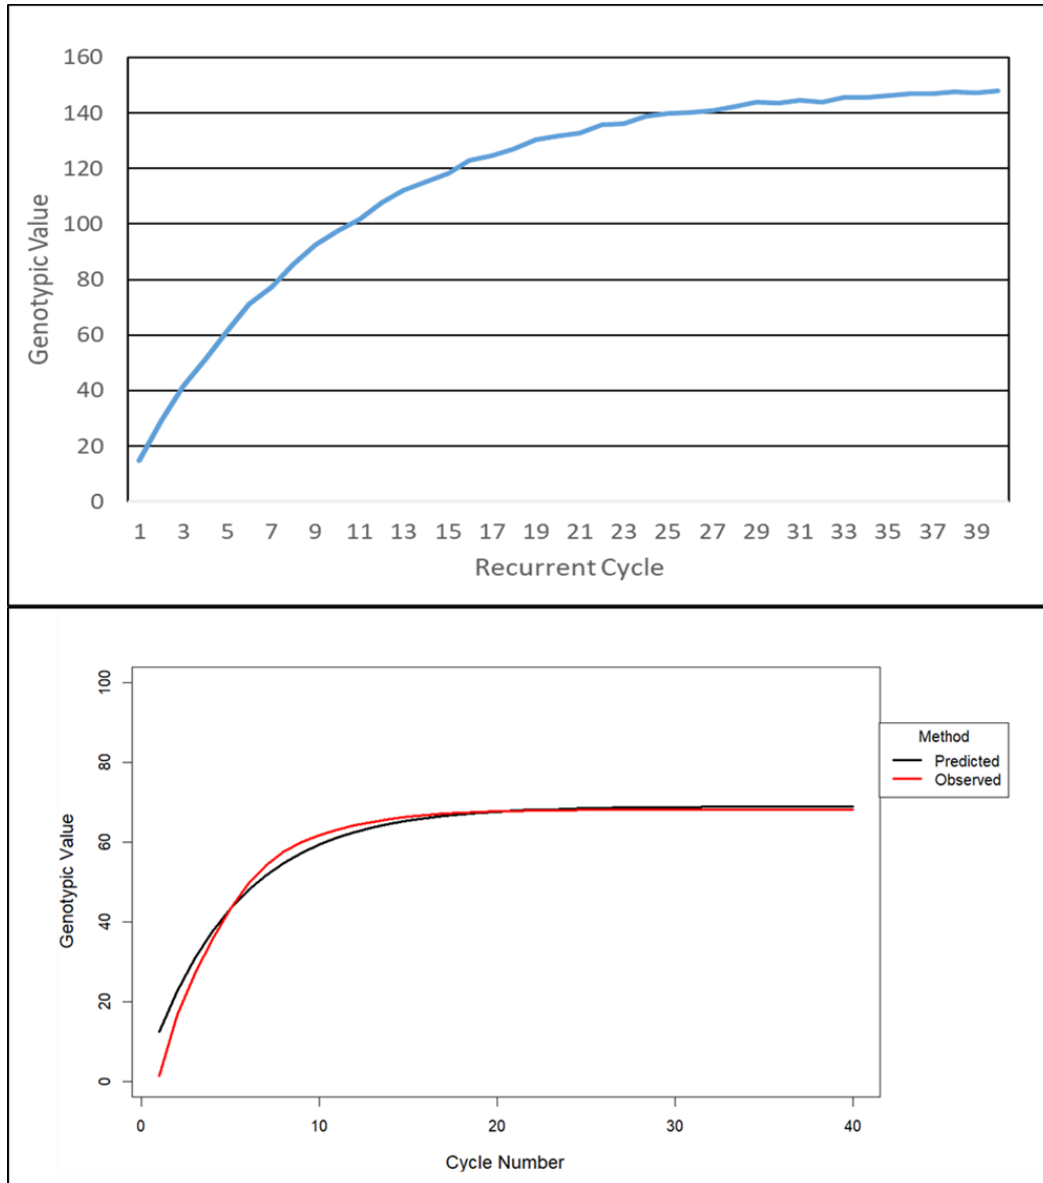

**Figure 3 Theoretical and Simulated Genotypic Values:** A) (Top Panel) Theoretical Genotypic Values from 40 cycles of recurrent selection modeled with the recurrence equation,  $y_c = \alpha^c y_0 + \beta \frac{1 - \alpha^c}{1 - \alpha}$  where  $y_c$  represents the genotypic value in cycle  $c$ , with  $c = 1, 2, \dots, 40$  and values of  $\alpha$  and  $\beta$  are 0.9 and 15 respectively. B) (Bottom Panel) Averaged genotypic values for 40 cycles of simulated recurrent selection. Genotypic values are averaged across selection methods, training sets, selection intensities, number of simulated QTL and simulated heritabilities. Predicted curve is modelled with  $\alpha = 0.82$ ,  $\beta = 12.37$ , that were obtained from 'nls' fit with completed dataset without any grouping.



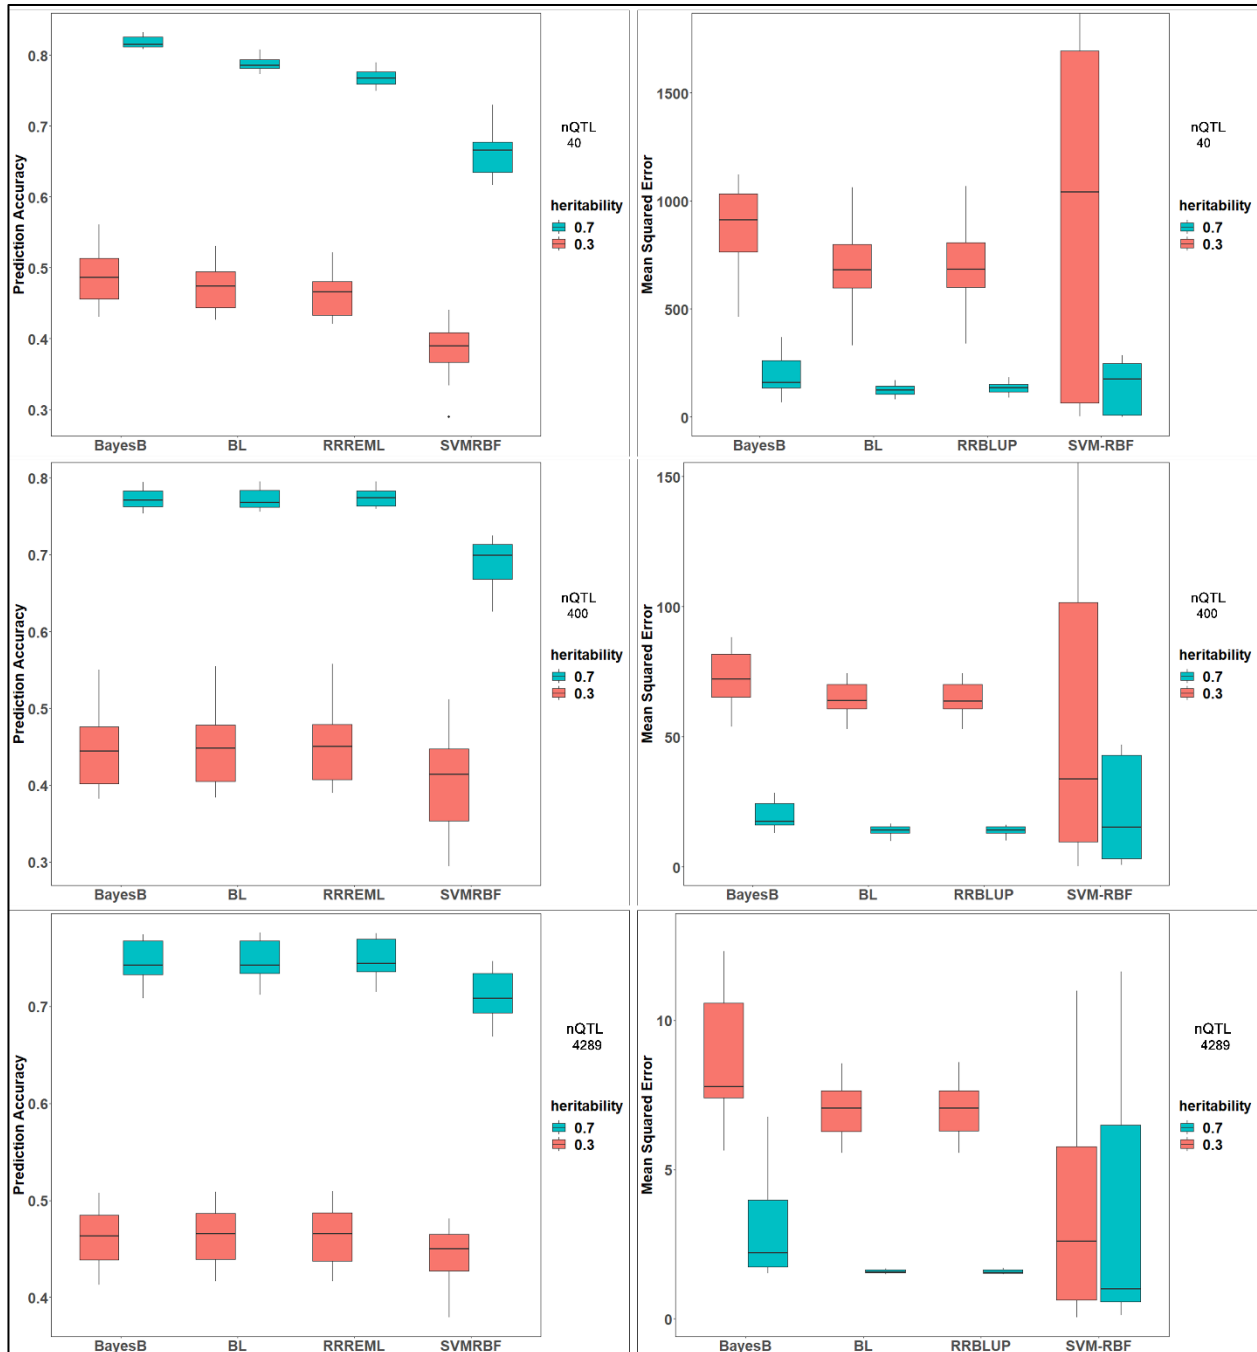

**Figure 4 Estimated prediction accuracies and MSE in Founding Set of RILs:** Estimated prediction accuracies (left panel) and mean squared errors (right panel) for four genomic prediction (GP) models: BayesB, BL (Bayes LASSO), RRREML (Ridge Regression with REML) and SVMRBF (Support Vector Machines with Radial Basis Function Kernel) trained with  $F_5$  RILs derived from crosses of 20 homozygous founder lines with IA3023. Phenotypes used to train the GP models consisted of genetic architectures comprised of 40, 400 and 4289 simulated QTL (top, middle and bottom) that were responsible for 70% (blue) and 30% (red) of phenotypic variability in the initial populations.

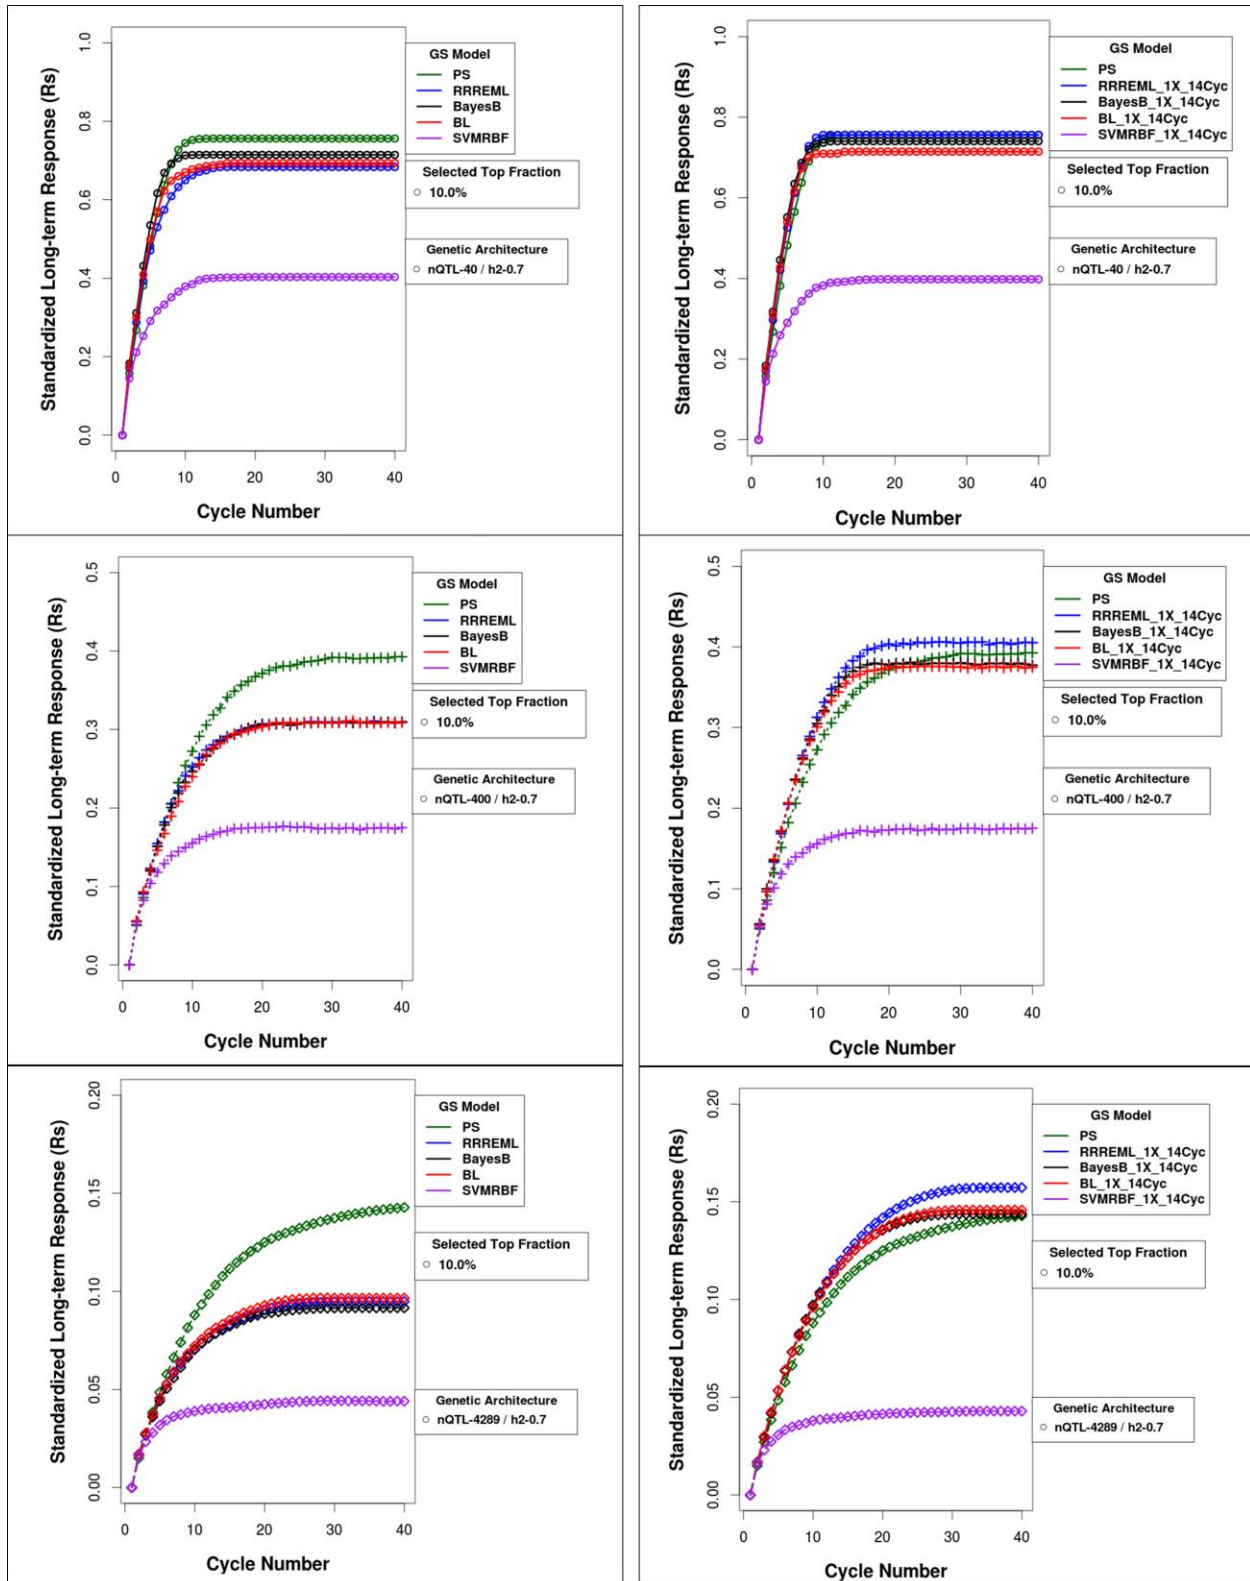

**Figure 5 Standardized Responses for Comparison of GS methods with and without Updating for 0.7 H and Top 10% Selected Fraction** Forty cycles of standardized responses to selection of 10% of 2000 soybean RILs per cycle. Standardized responses are plotted by selection methods without (left panels) and with (right panels) model updating using prior cycles as training sets for four genotypic prediction models. Phenotypic selection (PS) is not updated and hence is the same in the left and right panels. The top panels consist of responses for genetic architectures consisting of 40 simulated QTL. Middle panels consist of responses for genetic architectures consisting of 400 simulated QTL and the bottom panels consist of responses for genetic architectures consisting of 4289 simulated QTL. All 40, 400, and 4289 simulated QTL are responsible for 70% of phenotypic variability in the initial population. PS - Phenotypic Selection, RR-REML- Ridge Regression with Restricted Maximum Likelihood, BL - Bayes LASSO, and SVMRBF- Support Vector Machine with Radial Basis Kernel.

| Method  | QTL  | heritability | TH5    | TH10   | TH15   | TH20   | TH25   | TH30   | TH35   | TH40   |
|---------|------|--------------|--------|--------|--------|--------|--------|--------|--------|--------|
| RR-REML | 40   | 0.7          | -2.36  | -12.71 | -9.63  | -9.61  | -9.61  | -9.61  | -9.61  | -9.61  |
| BayesB  | 40   | 0.7          | 10.96  | -4.18  | -5.49  | -5.49  | -5.49  | -5.49  | -5.49  | -5.49  |
| BL      | 40   | 0.7          | 3.46   | -9.96  | -8.77  | -8.24  | -8.24  | -8.24  | -8.24  | -8.24  |
| SVMRBF  | 40   | 0.7          | -39.67 | -49.09 | -46.90 | -46.67 | -46.67 | -46.67 | -46.67 | -46.67 |
|         |      |              |        |        |        |        |        |        |        |        |
| RR-REML | 400  | 0.7          | 2.42   | -7.37  | -14.57 | -17.25 | -19.61 | -20.96 | -20.93 | -21.11 |
| BayesB  | 400  | 0.7          | 0.10   | -9.53  | -14.89 | -17.58 | -19.94 | -21.26 | -21.05 | -21.11 |
| BL      | 400  | 0.7          | -3.35  | -11.95 | -15.15 | -18.26 | -19.62 | -21.21 | -20.80 | -21.37 |
| SVMRBF  | 400  | 0.7          | -21.91 | -43.06 | -49.93 | -52.95 | -54.26 | -55.48 | -55.46 | -55.42 |
|         |      |              |        |        |        |        |        |        |        |        |
| RR-REML | 4289 | 0.7          | -6.26  | -20.12 | -25.33 | -27.60 | -29.16 | -30.98 | -32.60 | -33.57 |
| BayesB  | 4289 | 0.7          | -9.07  | -19.79 | -26.28 | -29.14 | -31.30 | -33.37 | -34.90 | -35.84 |
| BL      | 4289 | 0.7          | -5.85  | -17.94 | -23.50 | -25.70 | -27.24 | -29.66 | -31.36 | -32.35 |
| SVMRBF  | 4289 | 0.7          | -34.49 | -55.74 | -63.38 | -66.01 | -66.85 | -67.79 | -68.60 | -69.15 |

**Figure 6 Heat Map for Percent Gain in Rs Relative to PS for 0.7 H for GP Models without Updating:**

Heat map indicating standardized response relative to PS as percentage gain after 40 cycles of recurrent selection using genomic prediction models without updated training sets for 40, 400, 4289 simulated QTL responsible for 70% of phenotypic variability in the initial population. Blue to red shaded cells represent increasing gain in response relative to PS. RR-REML- Ridge Regression with Restricted Maximum Likelihood, BL - Bayes LASSO, and SVMRBF- Support Vector Machine with Radial Basis Kernel.

| Method  | QTL  | heritability | No. Prior Cycles | TH5    | TH10   | TH15   | TH20   | TH25   | TH30   | TH35   | TH40   |
|---------|------|--------------|------------------|--------|--------|--------|--------|--------|--------|--------|--------|
| RR-REML | 40   | 0.7          | 14               | 9.04   | 1.55   | 0.00   | 0.00   | 0.00   | 0.00   | 0.00   | 0.00   |
| BayesB  | 40   | 0.7          | 14               | 14.41  | -1.05  | -2.06  | -2.06  | -2.06  | -2.06  | -2.06  | -2.06  |
| BL      | 40   | 0.7          | 14               | 11.89  | -4.70  | -5.49  | -5.49  | -5.49  | -5.49  | -5.49  | -5.49  |
| SVMRBF  | 40   | 0.7          | 14               | -39.85 | -48.58 | -47.63 | -47.36 | -47.36 | -47.36 | -47.36 | -47.36 |
| RR-REML | 400  | 0.7          | 14               | 11.34  | 14.84  | 12.30  | 8.71   | 5.73   | 3.29   | 3.50   | 3.22   |
| BayesB  | 400  | 0.7          | 14               | 13.05  | 12.00  | 8.38   | 1.75   | -1.11  | -2.96  | -3.02  | -3.91  |
| BL      | 400  | 0.7          | 14               | 13.85  | 10.44  | 6.45   | 1.02   | -1.89  | -4.24  | -3.92  | -4.55  |
| SVMRBF  | 400  | 0.7          | 14               | -21.66 | -42.81 | -50.39 | -53.52 | -54.86 | -55.38 | -55.48 | -55.40 |
| RR-REML | 4289 | 0.7          | 14               | 10.01  | 10.51  | 11.79  | 13.39  | 14.52  | 13.67  | 11.70  | 10.13  |
| BayesB  | 4289 | 0.7          | 14               | 10.10  | 10.41  | 9.09   | 8.31   | 7.20   | 4.56   | 2.06   | 0.60   |
| BL      | 4289 | 0.7          | 14               | 10.32  | 9.22   | 8.87   | 8.78   | 8.22   | 6.11   | 3.59   | 2.10   |
| SVMRBF  | 4289 | 0.7          | 14               | -36.73 | -56.79 | -64.13 | -66.87 | -68.08 | -68.97 | -69.49 | -69.96 |

**Figure 7 Heat Map for Percent Gain in Rs Relative to PS for 0.7 H for GP Models with Updating:** Heat map indicating standardized response relative to PS as percentage gain after 40 cycles of recurrent selection using genomic prediction models with updated training sets from up to 14 prior cycles of selection for 40, 400, and 4289 simulated QTL responsible for 70% of phenotypic variability in the initial population. Blue to red shaded cells represent increasing gain in response relative to PS. RR-REML- Ridge Regression with Restricted Maximum Likelihood, BL - Bayes LASSO, and SVMRBF- Support Vector Machine with Radial Basis Kernel.

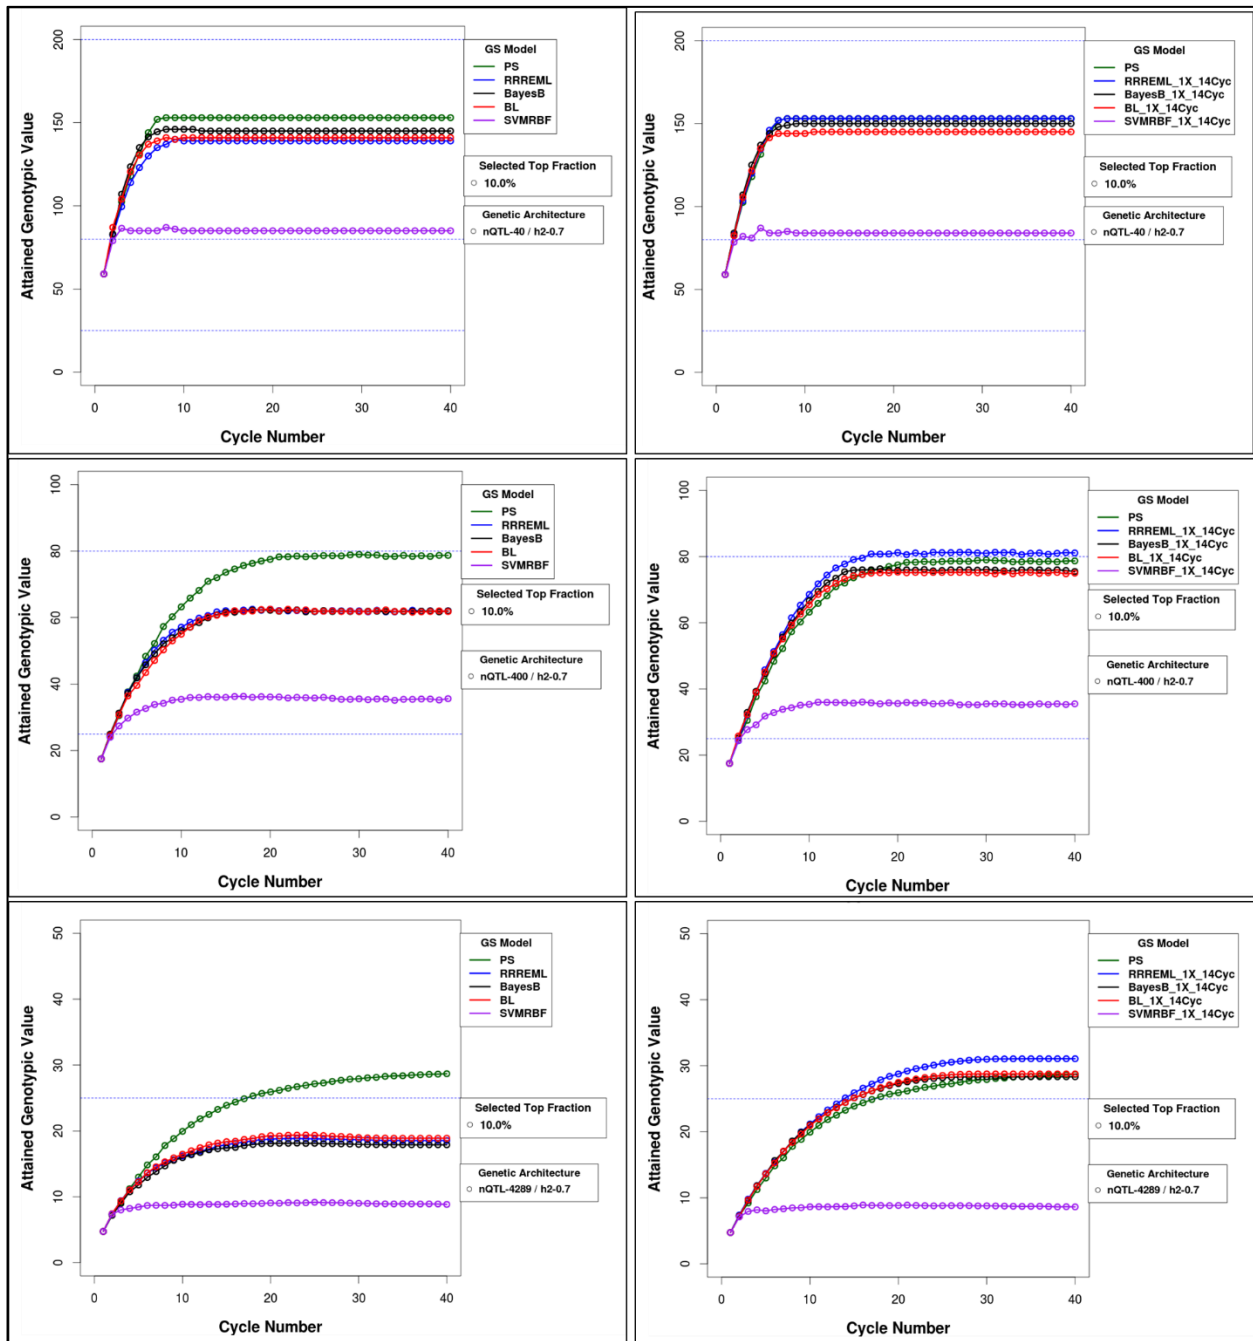

**Figure 8 Attained Genotypic Value for Comparison of GS methods with and without Updating for 0.7 H and Top 10% Selected Fraction:** Maximum attained genotypic values (Mgvs) in recurrent genomic selection and phenotypic selection (PS) without updating the training sets in the left panels and with training set updates from up to 14 prior cycles in the right panels. PS has no training sets and hence does not change between the left and right panels. a) 40 QTL (top), b) 400 QTL (middle) and c) 4289 QTL (bottom) responsible for 70% of phenotypic variability in the initial population and selection of 10% of the RILs in each cycle. PS - Phenotypic Selection, RR-REML- Ridge Regression with Restricted Maximum Likelihood, BL - Bayes LASSO, and SVMRBF- Support Vector Machine with Radial Basis Kernel.

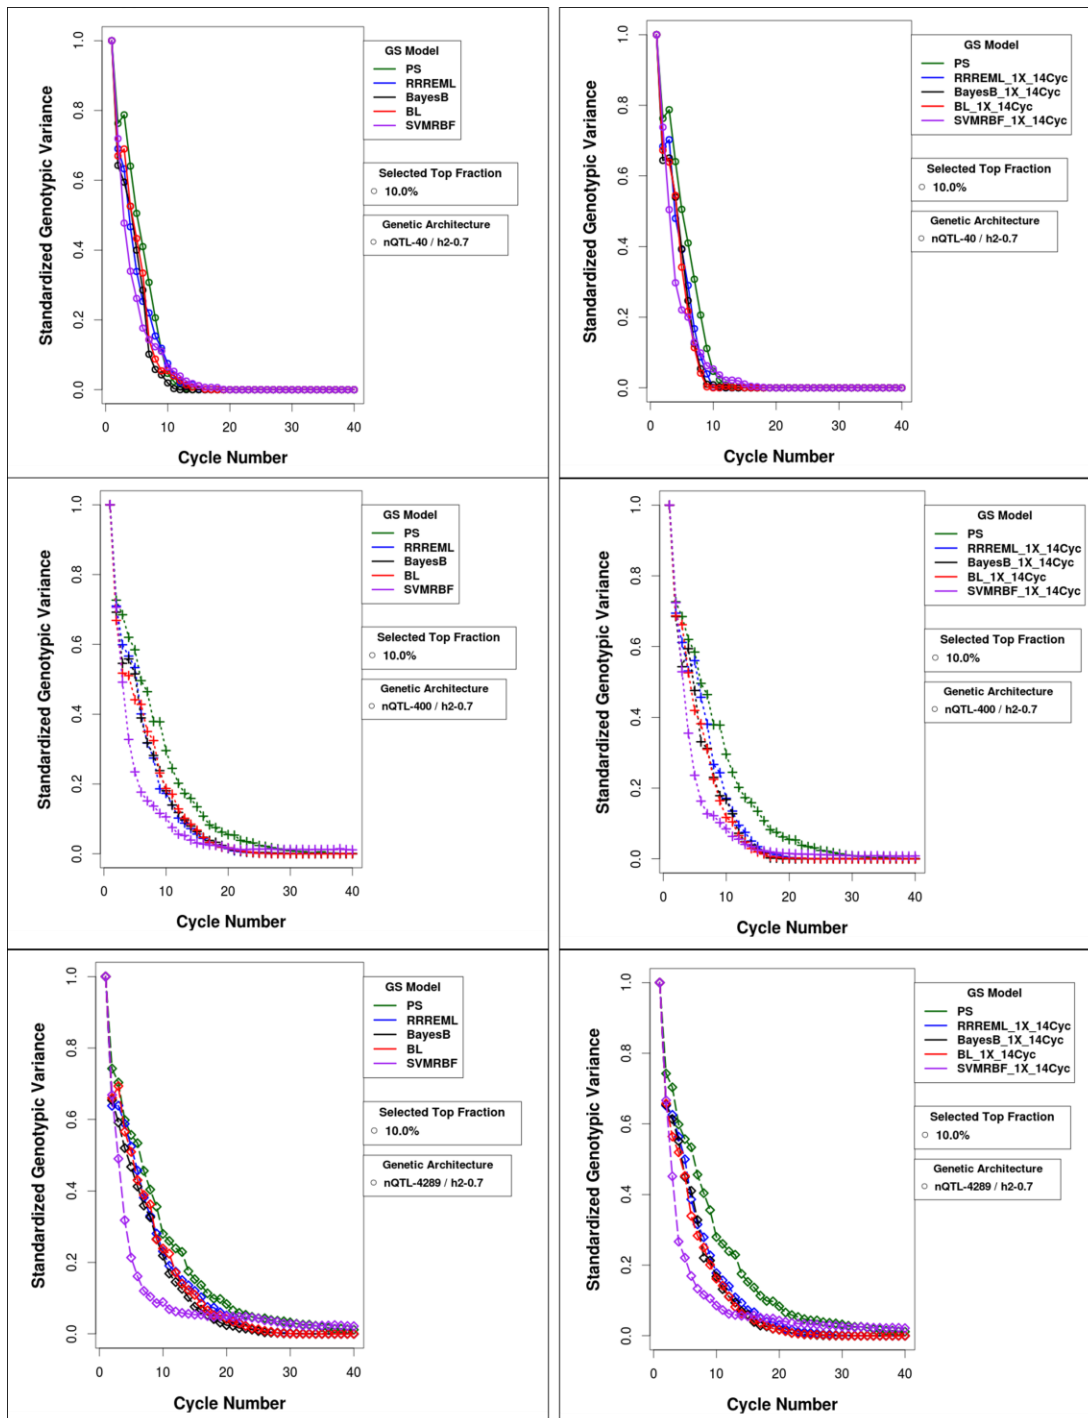

**Figure 9 Standardized Genotypic Variance (Sgv) for Comparison of GS methods with and without Updating for 0.7 H and Top 10% Selected Fraction** Standardized genotypic variance without training set updating (left panels) and with training set updating with prior cycle training data (right panels) for the four GP models. PS has no updating and hence is the same in both left and right panels. A) Training data from up to 14 prior cycles for 40 simulated QTL (top), 400 simulated QTL (middle) and 4289 simulated QTL (bottom) responsible for 70% of phenotypic variability in the initial population and top 10% of RILs with the greatest predicted values. PS - Phenotypic Selection, RR-REML- Ridge Regression with Restricted Maximum Likelihood, BL - Bayes LASSO, and SVMRBF- Support Vector Machine with Radial Basis Kernel.



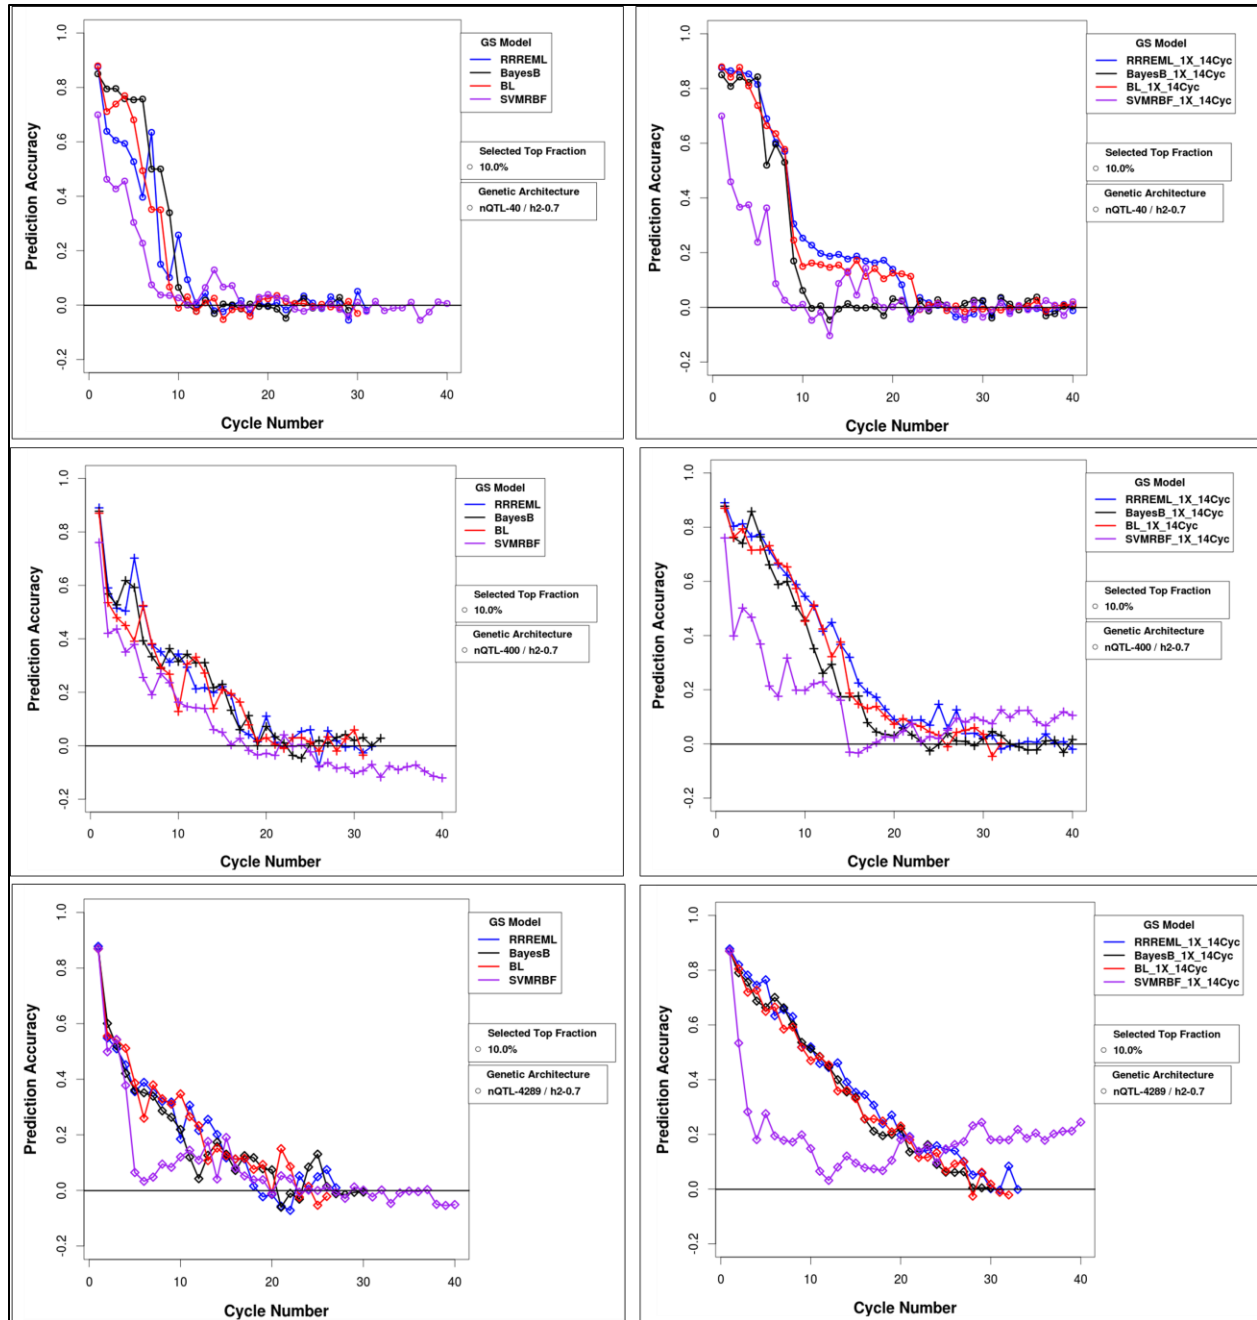

**Figure 10 Estimated Prediction Accuracies for Comparison of GS methods with and without Updating for 0.7 H and Top 10% Selected Fraction:** Estimated prediction accuracies with updates to the training sets used in genomic prediction (GP) models. Training data from up to 14 prior selection cycles were used to update all four GP models for 40 QTL (top), 400 QTL (middle) and 4289 QTL (bottom) responsible for 70% of phenotypic variability in the initial population and top 10% of RILs with the greatest predicted values. RR-REML- Ridge Regression with Restricted Maximum Likelihood, BL - Bayes LASSO, and SVMRBF- Support Vector Machine with Radial Basis Kernel.

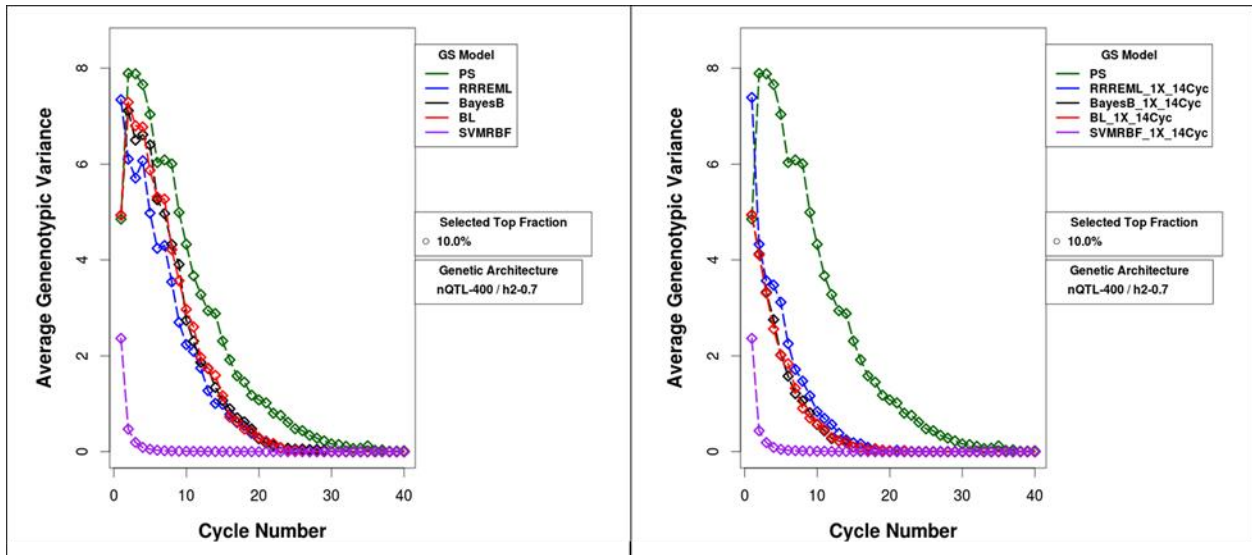

**Figure 11 Average Genotypic Variance in Selected Populations for Comparison of GS methods with and without Updating for 400 QTL, 0.7 H and Top 10% Selected Fraction:** Average genotypic variance for 40 cycles of recurrent selection of 10% of RILs using five selection methods without updated training sets (left panel) and with updated training sets (right panel). Training sets consisted of genotypic and phenotypic data from up to 14 prior cycles of recurrent selection. Simulated phenotypic values of the RILs consisted of 400 simulated QTL responsible for 70% of phenotypic variability in the initial population. PS - Phenotypic Selection, RR-REML- Ridge Regression with Restricted Maximum Likelihood, BL - Bayes LASSO, and SVMRBF- Support Vector Machine with Radial Basis Kernel.

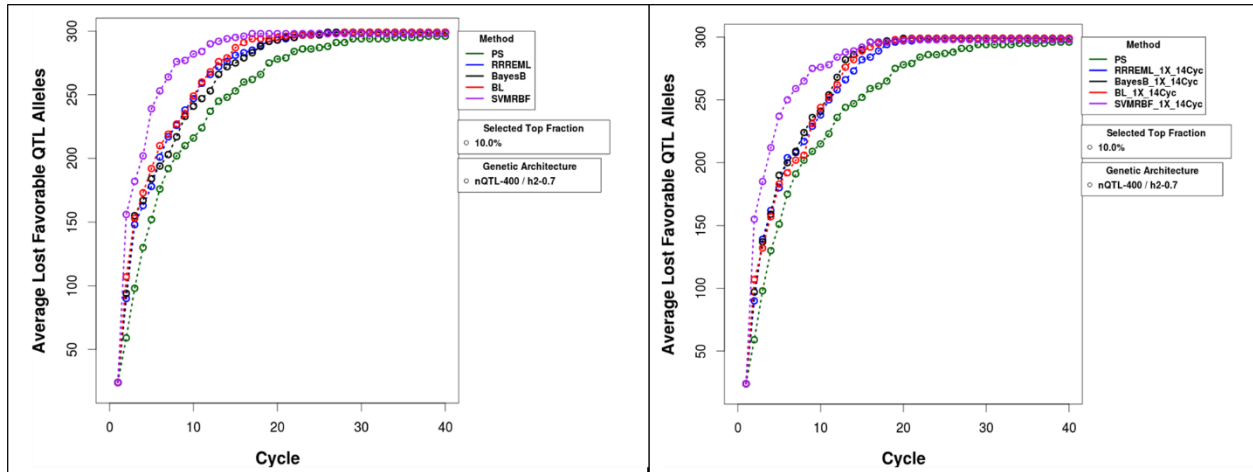

**Figure 12: Number of Lost Favorable Alleles for Comparison of GS methods with and without Updating for 400 QTL, 0.7 H and Top 10% Selected Fraction:** Number of favorable alleles that are cumulatively discarded across 40 cycles of recurrent selection of 10% of the RILs created every generation using five selection methods without updated training sets (left panel) and with updated training sets (right panel). Training sets consisted of genotypic and phenotypic data from up to 14 prior cycles of recurrent selection. Simulated phenotypic values of the RILs consisted of 400 simulated QTL responsible for 70% of phenotypic variability in the initial population. PS - Phenotypic Selection, RR-REML- Ridge Regression with Restricted Maximum Likelihood, BL - Bayes LASSO, and SVMRBF- Support Vector Machine with Radial Basis Kernel.

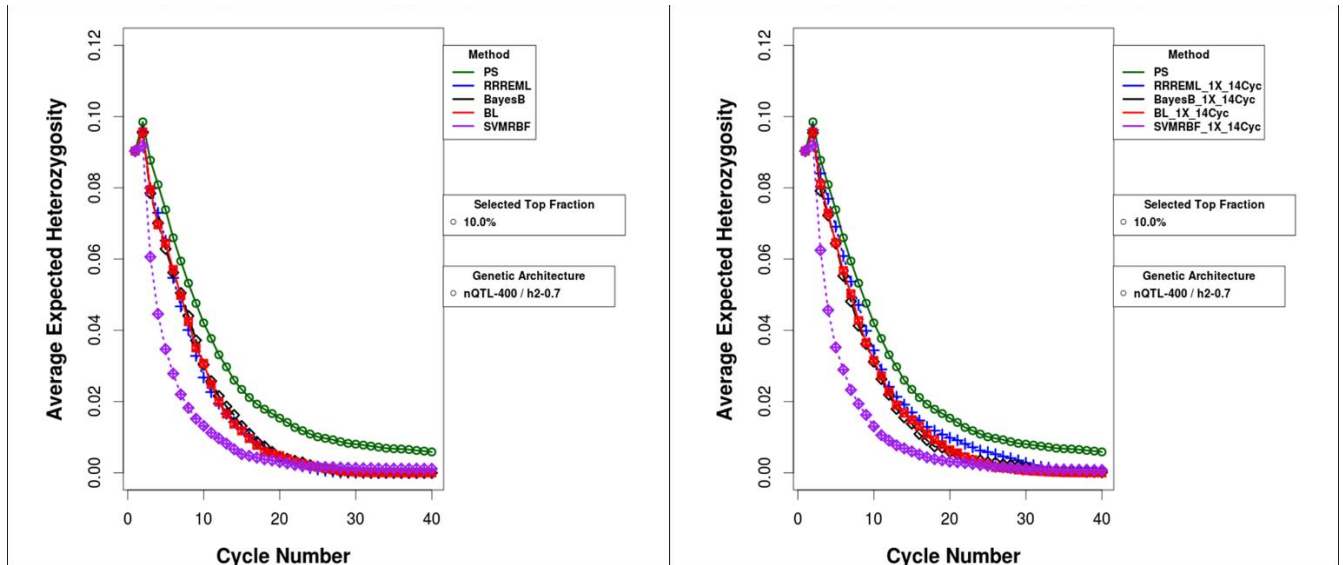

**Figure 13 Average Expected Heterozygosity for Comparison of GS methods with and without Updating for 400 QTL, 0.7 H and Top 10% Selected Fraction:** Average Expected Heterozygosity in recurrent GS without GP model updating (left panel) and GP models updated every cycle with training data from upto 14 prior cycles (right panel). All treatment combinations have 400 simulated QTL responsible for 70% of phenotypic variability in the initial population and 10% top selected fraction. PS - Phenotypic Selection, RR-REML- Ridge Regression with Restricted Maximum Likelihood, BL - Bayes LASSO, and SVMRBF- Support Vector Machine with Radial Basis Kernel.

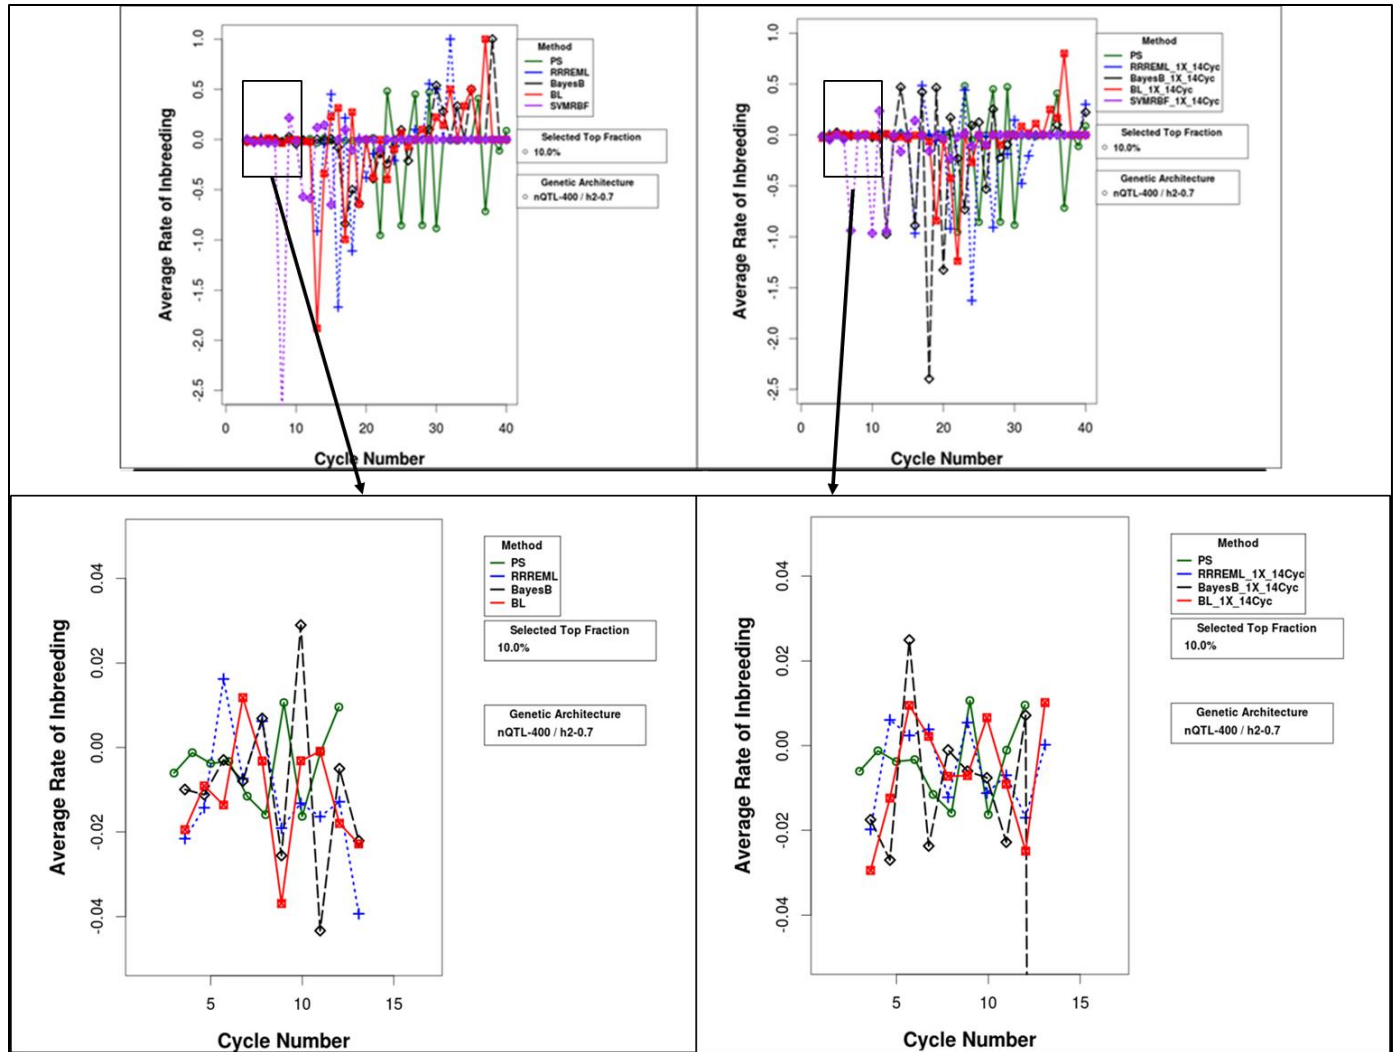

**Figure 14 Average Rate of Inbreeding for Comparison of GS methods with and without Updating for 400 QTL, 0.7 H and Top 10% Selected Fraction:** Average rate of inbreeding in recurrent GS without GP model updating (left panel) and GP models updated every cycle with training data from upto 14 prior cycles. Inbreeding coefficient is estimated as the harmonic mean of all individuals in the population for 40 cycles (top panel). Inset plot (bottom panel) shows magnified region from 3-12 cycles in average rate of inbreeding for PS, RR, BayesB, and BL GS methods. All treatment combinations have 400 simulated QTL responsible for 70% of phenotypic variability in the initial population and 10% top selected fraction. PS - Phenotypic Selection, RR-REML- Ridge Regression with Restricted Maximum Likelihood, BL - Bayes LASSO, and SVMRBF- Support Vector Machine with Radial Basis Kernel.

## Tables

**TABLE 1: FACTORIAL DESIGN**

| Factors                                                    | Number of Levels             | Values for Levels                                                                                                                                |
|------------------------------------------------------------|------------------------------|--------------------------------------------------------------------------------------------------------------------------------------------------|
| Number of QTL                                              | 3                            | 40, 400, 4289                                                                                                                                    |
| Heritability                                               | 2                            | 0.7, 0.3                                                                                                                                         |
| Selection Intensity                                        | 3                            | 2.67, 2.34, 1.75                                                                                                                                 |
| Selection Model                                            | 5                            | i) PS- Phenotypic value<br>ii) GS - GP(RR)<br>iii) GS - GP(Bayes B)<br>iv) GS - GP(Bayes LASSO)<br>v) GS - GP(SVM, Radial basis Function Kernel) |
| Model Update: number of prior cycles used in training sets | 4                            | i) 0 previous cycles<br>ii) 10 previous cycles<br>iii) 12 previous cycles<br>iv) 14 previous cycles                                              |
| Total Number of unique combinations                        | 360                          |                                                                                                                                                  |
| Total Number of Simulations                                | 3600 with 10 reps /condition |                                                                                                                                                  |

**TABLE 2 PACKAGES IN R FOR PARAMETRIC AND NON-PARAMETRIC MODELS WITH TUNING PARAMETERS**

| GS Model         | Package (R)                              | Model Tuning Parameters (BGLR package )                                                                                                                     |
|------------------|------------------------------------------|-------------------------------------------------------------------------------------------------------------------------------------------------------------|
| Ridge Regression | REML-EM (custom R script Xavier A, 2018) | EM algorithm for estimation of parameters with REML method without using matrix inversion                                                                   |
| Bayesian LASSO   | BGLR (Perez P et al, 2014 )              | Priors for<br>varE (df=3,S=0.25); varU (df=3,S=0.63);<br>lambda(shape=0.53,rate=5e-5)<br>type='random',value=30),<br>nlter=20000,<br>burnIn=2000,<br>thin=1 |
| Bayes B          | BGLR (Perez P et al, 2014 )              | nlter=41000, burnIn =1000,<br>df0=4, R2=0.7                                                                                                                 |
| SVM              | Rgtsvm (Wang Zhong et al, 2017)          | SVM with Radial basis function kernel on GPU                                                                                                                |

**TABLE 3 ANOVA FOR NON-LINEAR MIXED MODELS**

| <b>Model Description</b>                                     | <b>df</b> | <b>AIC</b> | <b>BIC</b> | <b>logLik</b> |
|--------------------------------------------------------------|-----------|------------|------------|---------------|
| M1: 2 curves, one for each simulated h2                      | 6         | 1490883.86 | 1490943.12 | -745435.93    |
| M2: 3 curves, one for each simulated SI                      | 6         | 1487947.33 | 1488006.60 | -743967.67    |
| M3: 3 curves, one for each nQTL level                        | 6         | 1271056.31 | 1271115.57 | -635522.15    |
| M4: 4 curves, one for each number of prior cycle TS levels   | 6         | 1491707.23 | 1491766.50 | -745847.61    |
| M5: 5 curves, one for each of SM levels                      | 6         | 1482602.97 | 1482662.24 | -741295.49    |
| M6: 6 curves, one for each of h2 and nQTL levels             | 9         | 1262672.35 | 1262761.25 | -631327.17    |
| M7: 6 curves, for each of h2 and SI levels                   | 9         | 1486685.15 | 1486774.05 | -743333.58    |
| M8: 8 curves, one for each combination of h2 and TS levels   | 9         | 1490439.19 | 1490528.09 | -745210.59    |
| M9: 9 curves, one for each level of SI and nQTL              | 9         | 1243669.76 | 1243758.65 | -621825.88    |
| M10: 10 curves, one for each level of SM and h2              | 9         | 1481466.69 | 1481555.59 | -740724.34    |
| M11: 12 curves, one for each level of TS and nQTL            | 9         | 1268945.50 | 1269034.40 | -634463.75    |
| M12: 12 curves, one for each level of TS and SI              | 9         | 1487510.42 | 1487599.31 | -743746.21    |
| M13: 15 curves, one for each combination of SM and nQTL      | 9         | 1194913.36 | 1195002.26 | -597447.68    |
| M14: 15 curves, one for each combination of SM and SI        | 9         | 1477442.03 | 1477530.93 | -738712.01    |
| M15: 20 curves , one for each combination of SM and TS       | 9         | 1481835.46 | 1481924.36 | -740908.73    |
| M16: 18 curves, one for each combination of SI, nQTL and h2  | 12        | 1233180.40 | 1233298.93 | -616578.20    |
| M17: 24 curves, one for each combination of SI, TS and h2    | 12        | 1486217.33 | 1486335.86 | -743096.66    |
| M18: 24 curves, one for each combination of TS, nQTL and h2  | 12        | 1260244.61 | 1260363.14 | -630110.31    |
| M19: 30 curves, one for each combination of SM, h2 and SI    | 12        | 1179040.14 | 1179158.67 | -589508.07    |
| M20: 30 curves, one for each combination of SM, nQTL and h2  | 12        | 1476040.79 | 1476159.32 | -738008.40    |
| M21: 36 curves, one for each combination of SI, nQTL, and TS | 15        | 1229771.09 | 1229919.25 | -614870.54    |
| M22: 40 curves, one for each combination of SM, h2 and TS    | 12        | 1480446.72 | 1480565.25 | -740211.36    |
| M23: 45 curves, one for each combination of SI, nQTL and SC  | 15        | 1107823.41 | 1107971.57 | -553896.70    |
| M24: 60 curves, one for each combination of SM, nQTL and TS  | 12        | 1188346.20 | 1188464.74 | -594161.10    |
| M25: 60 curves, one for each combination of SI, TS and SM    | 12        | 1476793.27 | 1476911.80 | -738384.64    |
| M26: 72 curves, one for each combination of TS, h2, nQTL, SI | 15        | 1230064.21 | 1230212.38 | -615017.11    |
| M27: 90 curves, one for each combination of SM, h2, nQTL, SI | 15        | 1107717.81 | 1107865.98 | -553843.91    |



|                                                                       |    |            |            |            |
|-----------------------------------------------------------------------|----|------------|------------|------------|
| M28: 120 curves, one for each combination of SM, h2, TS, SI           | 15 | 1475380.15 | 1475528.31 | -737675.07 |
| M29: 120 curves, one for each combination of SM, nQTL, TS, h2         | 15 | 1171315.89 | 1171464.05 | -585642.94 |
| M30: 180 curves, one for each combination of SM, nQTL, TS, SI         | 15 | 1123398.62 | 1123546.78 | -561684.31 |
| M31: 360 curves, one for each combination of SM, nQTL, TS, SI, and h2 | 6  | 1094075.09 | 1094134.35 | -547031.54 |

Table 3: Non-linear Mixed Models fit with increasing number of factors from M1 to M31. Factors include selection method with five levels comprising of PS and four GS models ('SM'), two levels for heritability ('h2'), three levels for number of QTL ('nQTL'), three levels for selection intensity ('SI'), and four levels for prior cycles in training set ('TS')

## End Of File
